# Supplementary material for: Chemical structure of cichorinotoxin, a cyclic lipodepsipeptide that is produced by Pseudomonas cichorii and causes varnish spots on lettuce
Source: publisher site journal article supplement (doi:10.3762/bjoc.15.27), 2019-02-01
Supplement: Additional file 1 [file 1860-5397-15-27-S1.pdf]

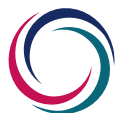

## Supporting Information

for

### **Chemical structure of cichorinotoxin, a cyclic lipodepsipeptide that is produced by *Pseudomonas cichorii* and causes varnish spots on lettuce**

Hidekazu Komatsu, Takashi Shirakawa, Takeo Uchiyama and Tsutomu Hoshino

*Beilstein J. Org. Chem.* **2019**, *15*, 299–309. [doi:10.3762/bjoc.15.27](https://doi.org/10.3762/bjoc.15.27)

### **Analytical data ( $^1\text{H}$ , $^{13}\text{C}$ NMR, IR and MS), photographs of bioassay methods**

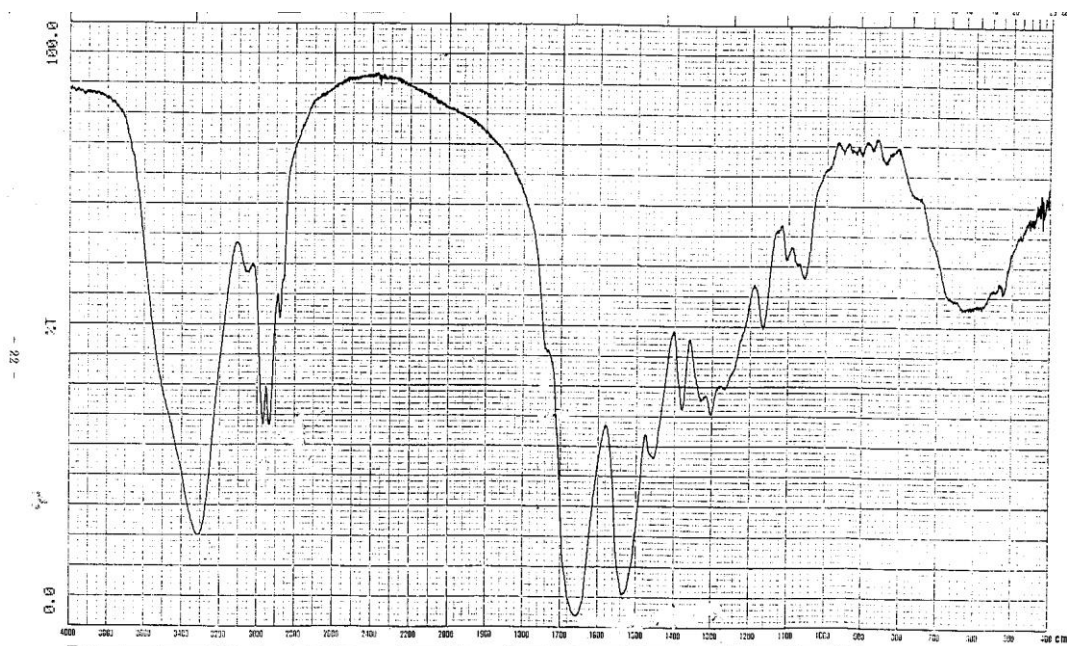

**Figure S1:** IR spectrum of cichorinotoxin (KBr method).

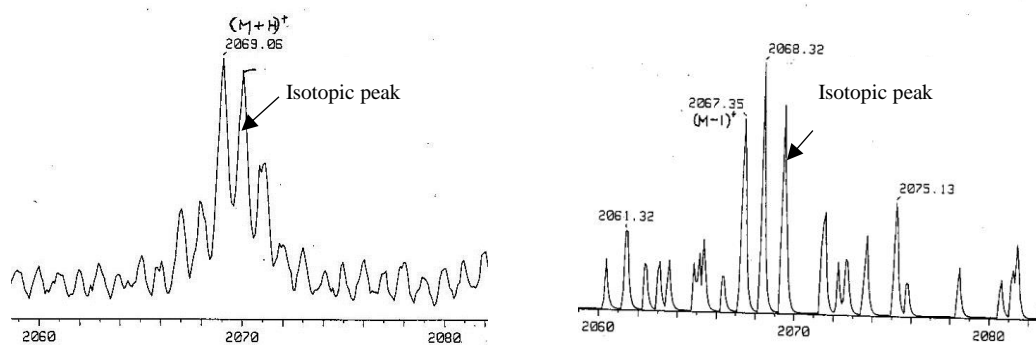

**Figure S2:** FABMS spectra of cichorinotoxin (matrix, *m*-NBA: *m*-nitrobenzenzyl alcohol); left, positive mode; right, negative mode.

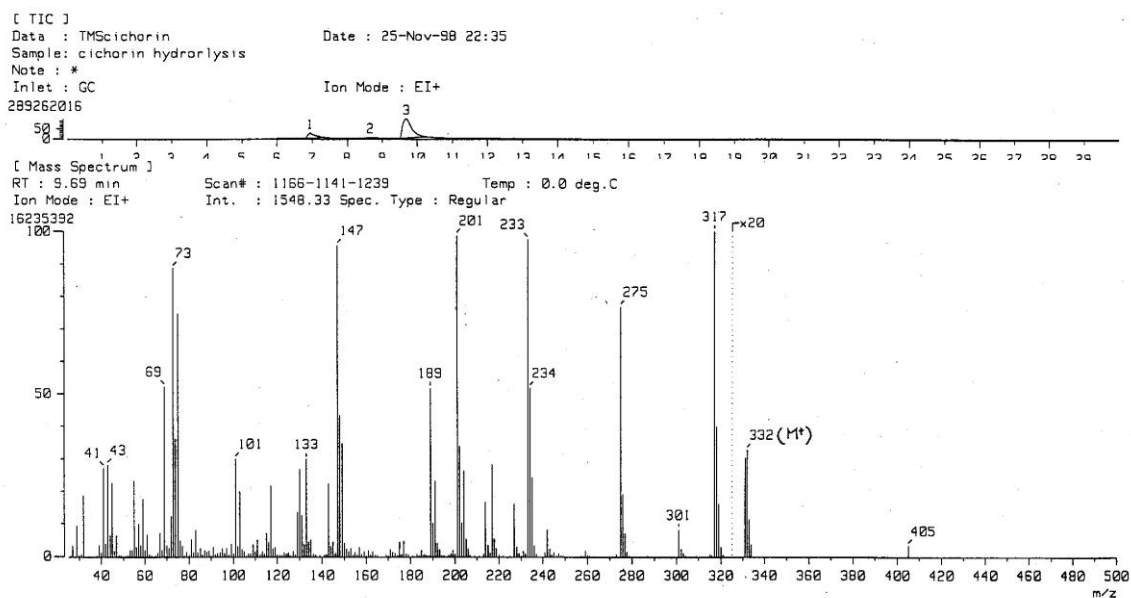

**Figure S3A:** GC-EIMS of the TMS derivative of the fatty acid included in cichorinotoxin.

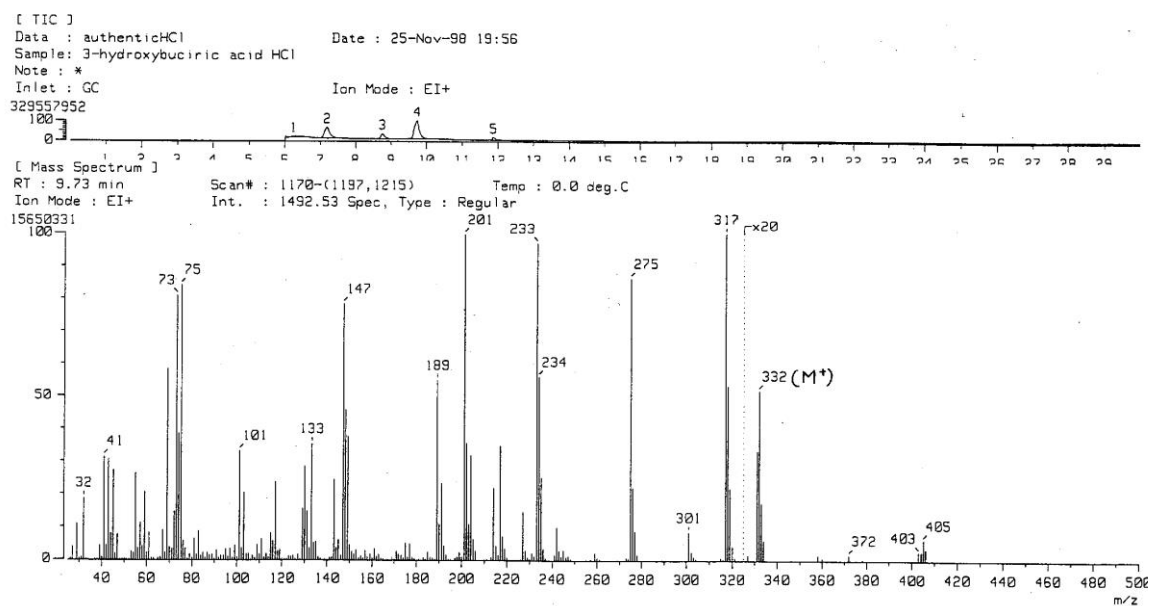

**Figure S3B:** GC-EIMS of the TMS derivative of commercially available 3-hydroxydecanoic acid.

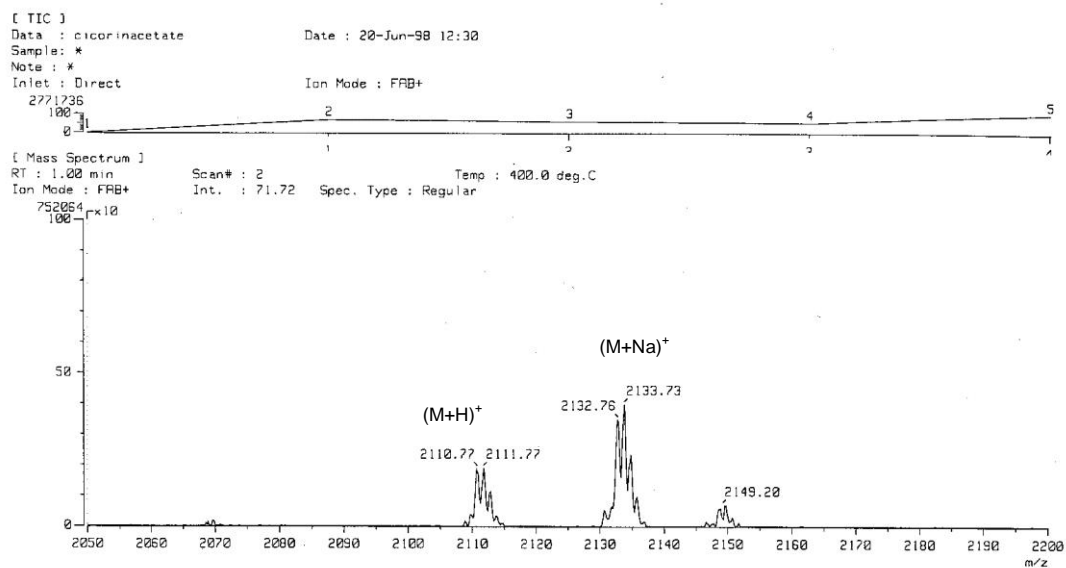

**Figure S4A:** FABMS spectrum of monoacetate of chicorinotoxin (+, NBA matrix), prepared with  $\text{Ac}_2\text{O}$  dissolved in a mixture of  $\text{CH}_3\text{CN}/\text{pH } 9.7$  aq buffer solution.

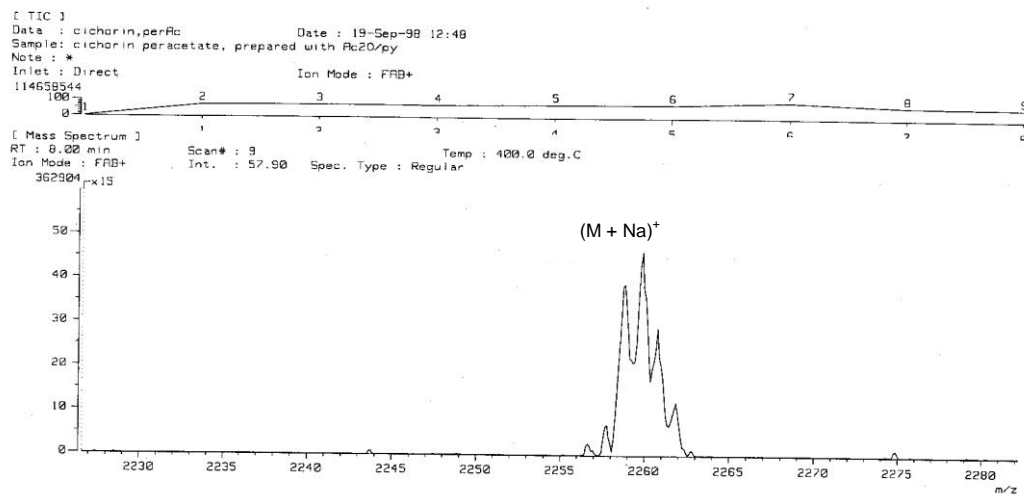

**Figure S4B:** FABMS spectrum of tetraacetate (peracetate) of chicorinotoxin (+, NBA matrix), prepared with  $\text{Ac}_2\text{O}/\text{Py}$ .



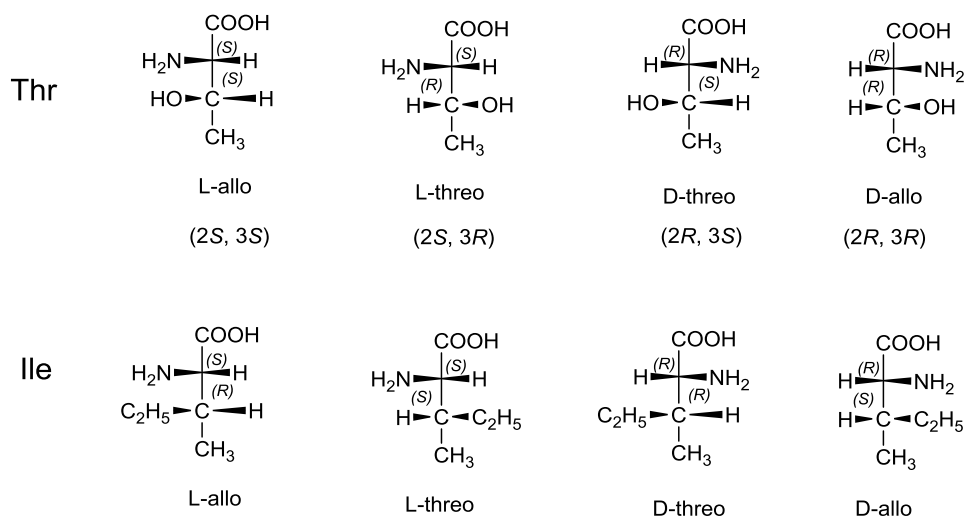

**Figure S5A:** Four different diastereomers of Thr and Ile amino acids.

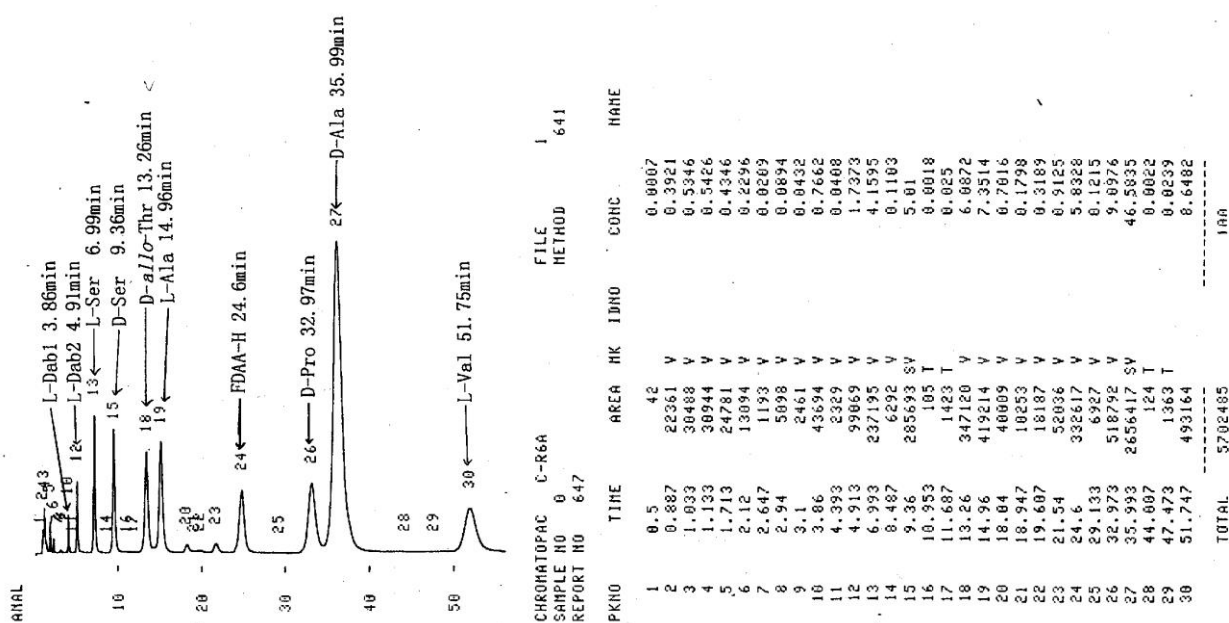

**Figure S5B:** HPLC profile of Marfey's derivatives of amino acids obtained from cichorinotoxin (elution solvent: 13% CH<sub>3</sub>CN–87% 50 mM trimethylamine phosphate buffer (pH 3.0)).

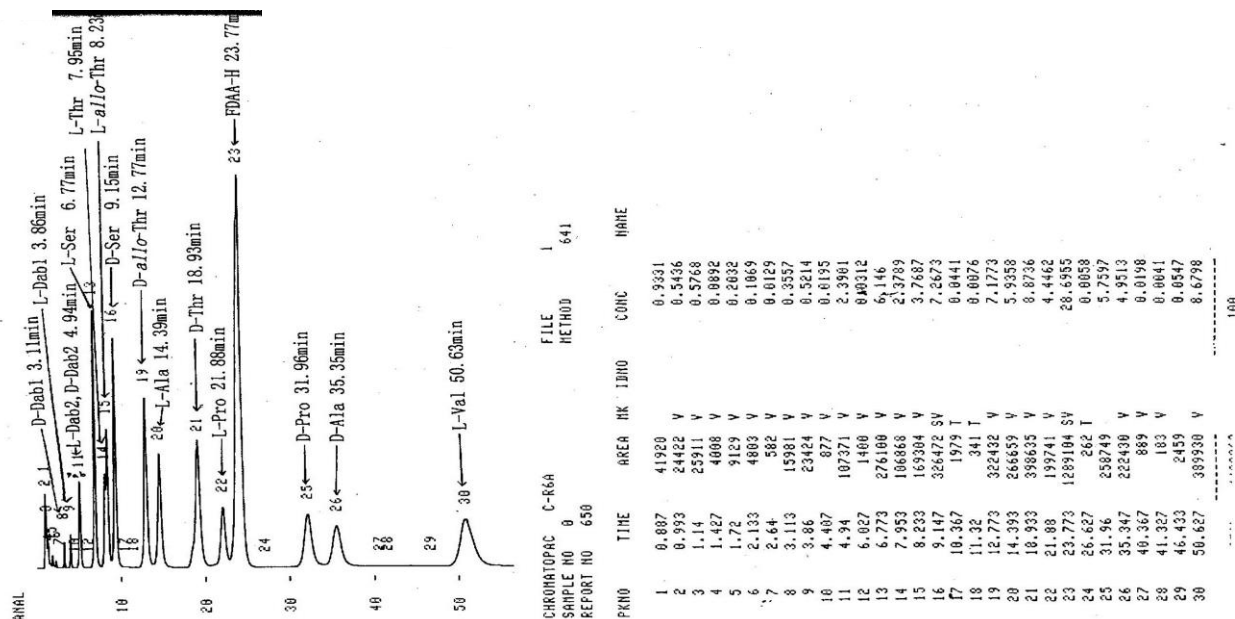

**Figure S5C:** HPLC profile of Marfey's derivatives of authentic amino acids (elution solvent: 13% CH<sub>3</sub>CN-87% 50 mM trimethylamine phosphate buffer (pH 3.0)). HPLC conditions were the same as those of Fig. S5B. The derivatives of authentic amino acids to be injected were as follows: D, L-Ser; D,L-Thr; D, L-alloThr; D, L-Ala, D, L-Pro, L-Val, the D and L-isomers of these amino acids having been separated. HPLC conditions: column: Shiseido CAPCELL PACK C18, UG120, S-3mm (1.6 × 100 mm), HPLC apparatus: Shimadzu LC-10A, flow rate 1.5 ml/min, detected at 340 nm.

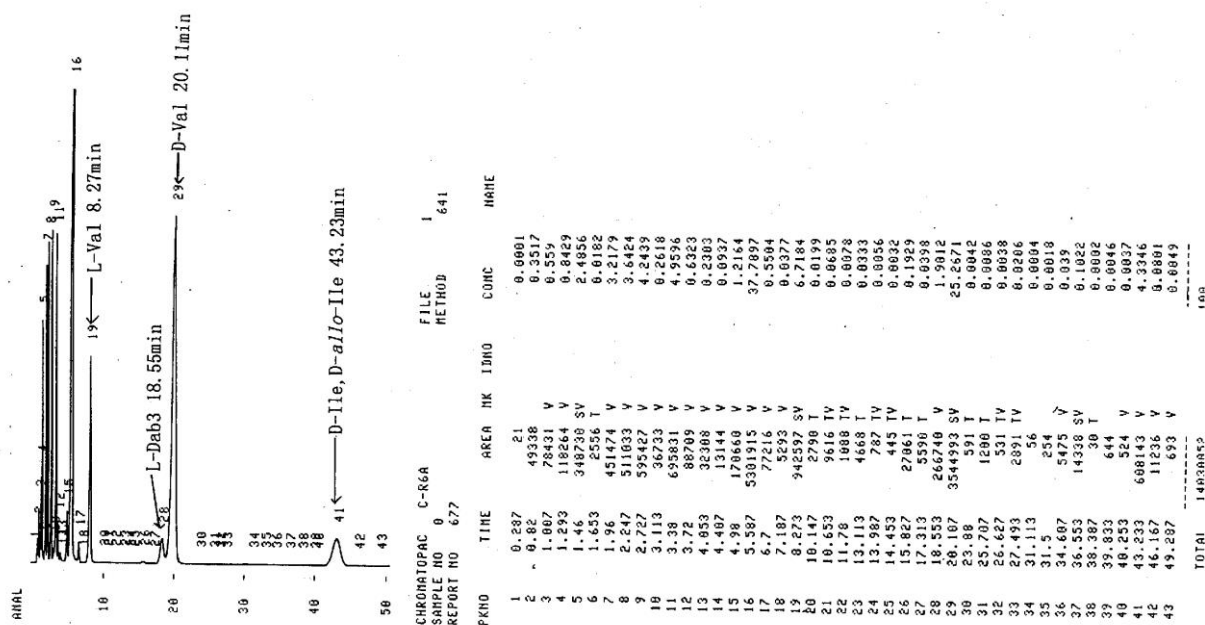

**Figure S5D.** HPLC profile of Marfey's derivatives of amino acids obtained from cichorinotoxin (elution solvent: 25%CH<sub>3</sub>CN-75% 50 mM trimethylamine phosphate buffer (pH 3.0)). HPLC conditions were the same as those of Figure S5B and 5C except elution solvent.



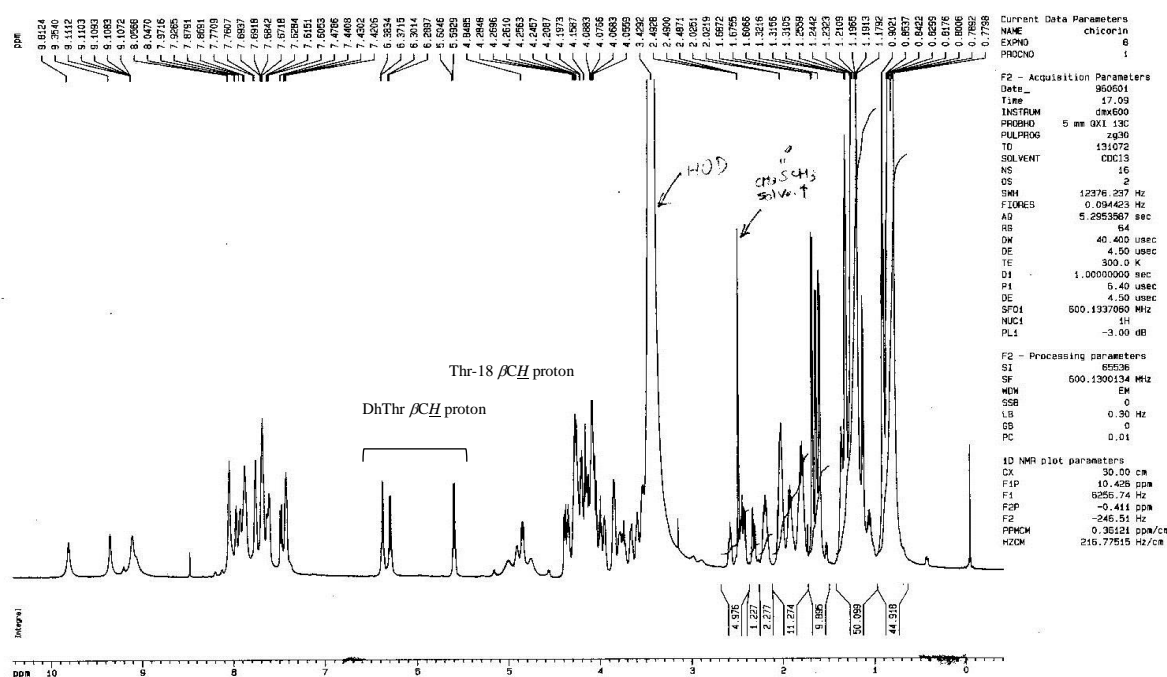

**Figure S6:**  $^1\text{H}$  NMR spectrum of cichorinotoxin (overall region) in  $\text{DMSO}-d_6$  measured at 600 MHz at ambient temperature. A large amount of natural cichorinotoxin is readily soluble in DMSO.

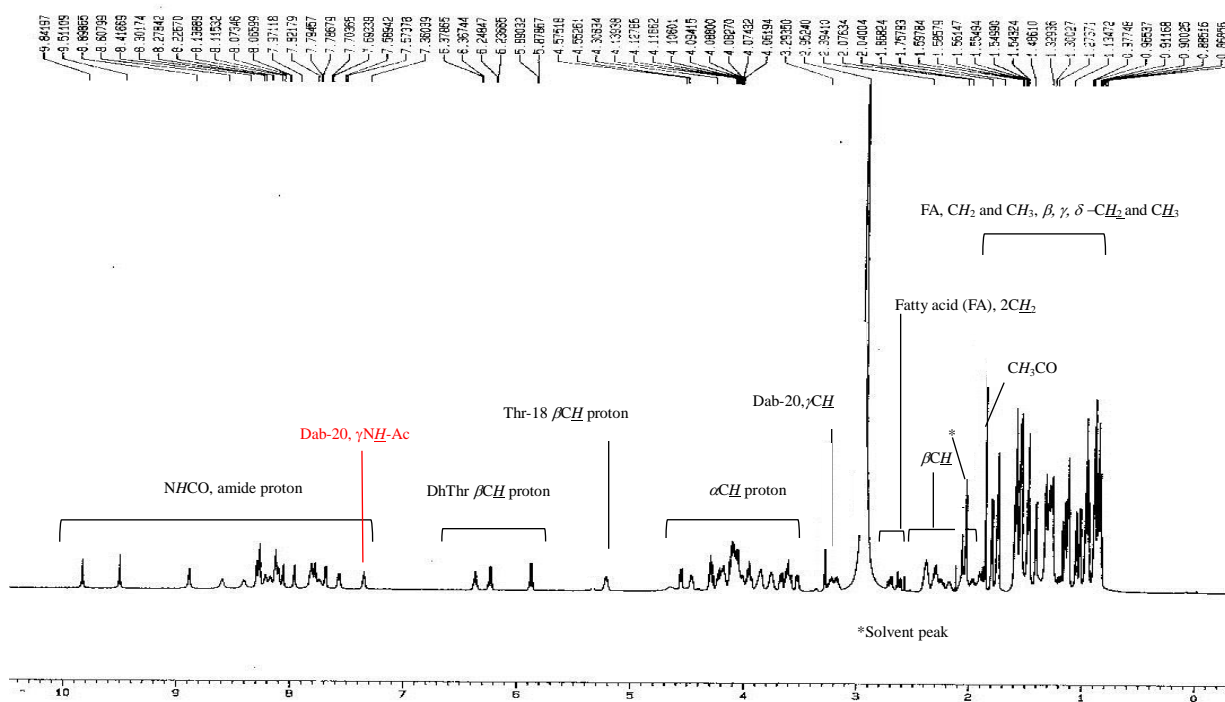

**Figure S7:**  $^1\text{H}$  NMR spectrum of cichorinotoxin monoacetate (overall region) in  $\text{acetone}-d_6$  measured at 600 MHz at ambient temperature.

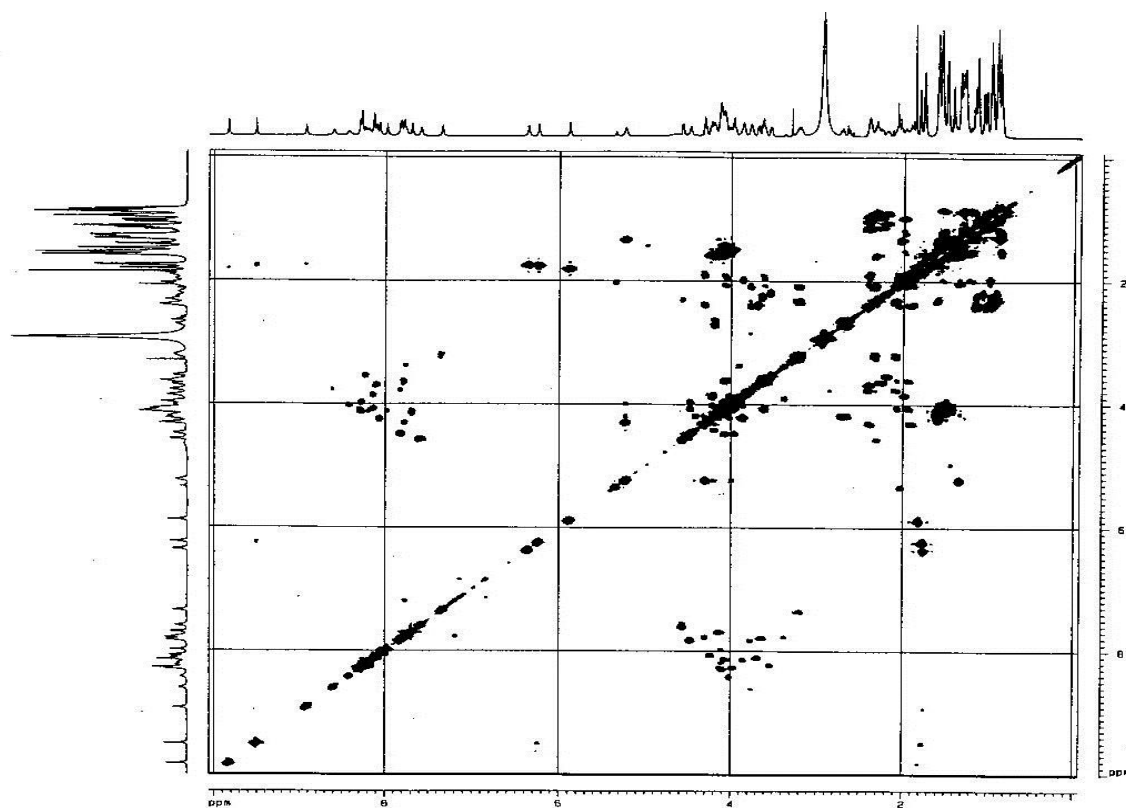

**Figure 8A:**  $^1\text{H}$ ,  $^1\text{H}$  COSY spectrum of the monoacetate (overall spectrum).

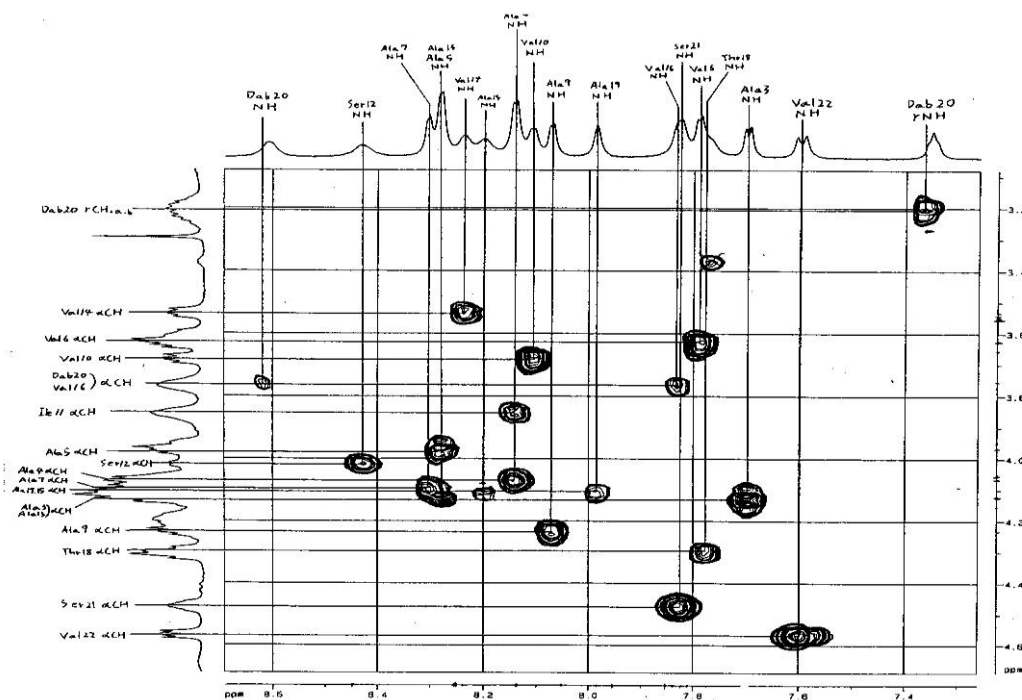

**Figure S8B:**  $^1\text{H}$ ,  $^1\text{H}$  COSY spectrum of the monoacetate, in which the spin couplings for  $\alpha\text{CH}/\text{amide NH}$  protons are highlighted.

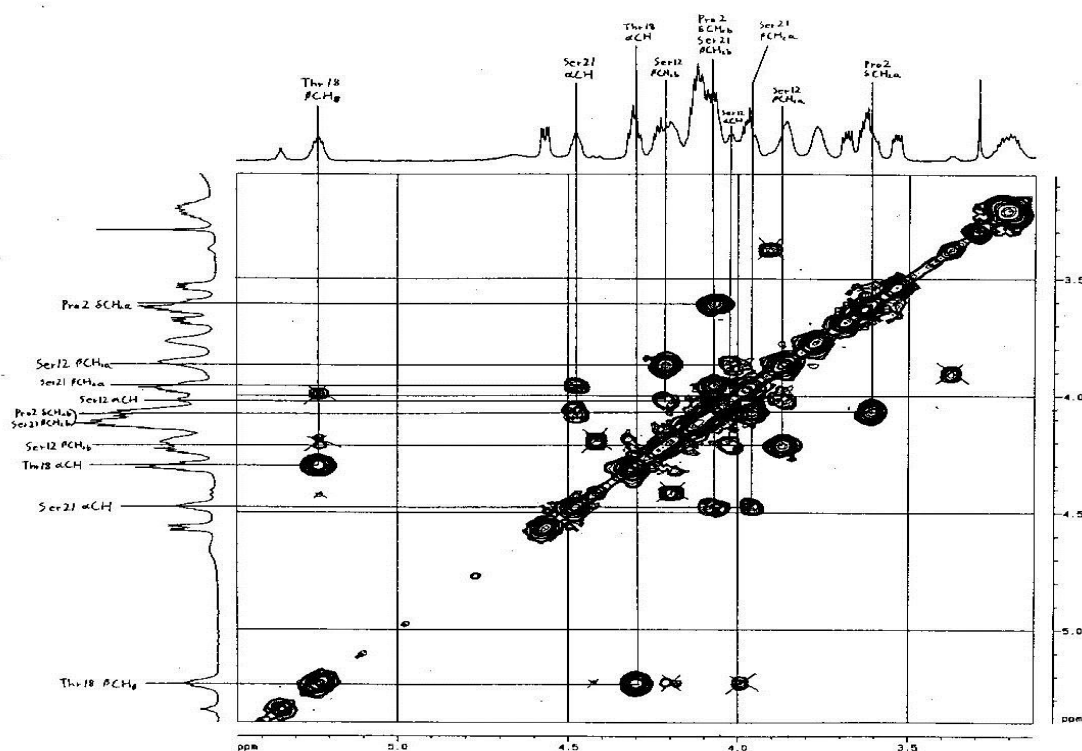

**Figure S8C:**  $^1\text{H}$ ,  $^1\text{H}$  COSY spectrum of the monoacetate, in which the proton spin–spin couplings for  $\alpha\text{CH}/\beta\text{CH}$  found in Ser, Thr and Pro residues are highlighted.

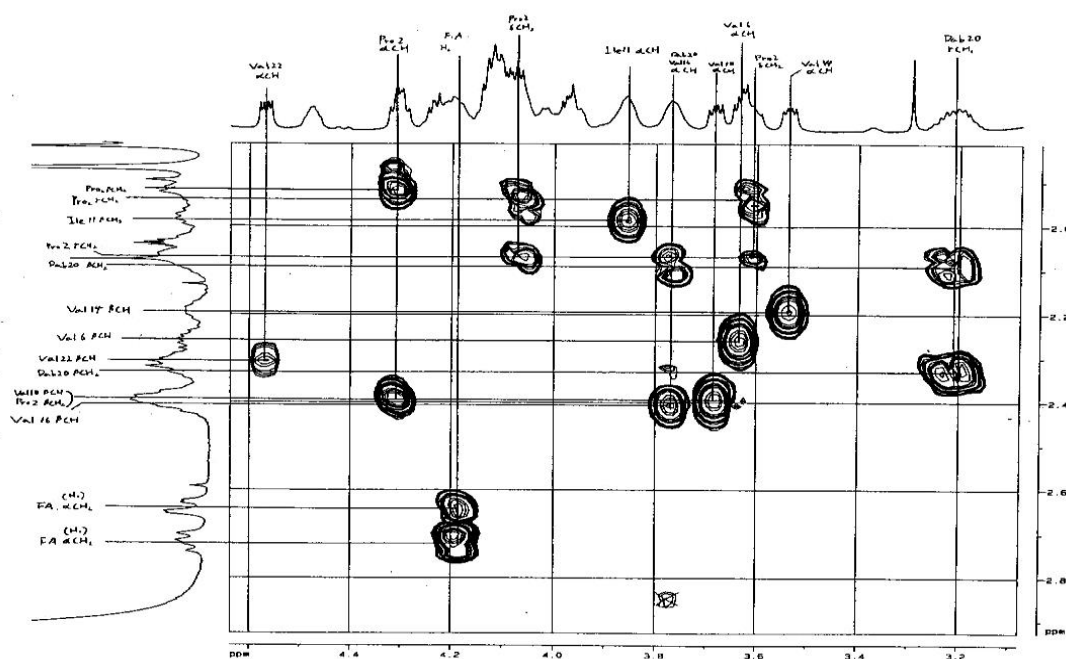

**Figure S8D:**  $^1\text{H}$ ,  $^1\text{H}$  COSY spectrum of the monoacetate, in which the COSY cross peaks of  $\alpha\text{CH}/\beta\text{CH}$  found mainly in other amino acids residues are highlighted (excluding the amino acids shown in Figure S8C).

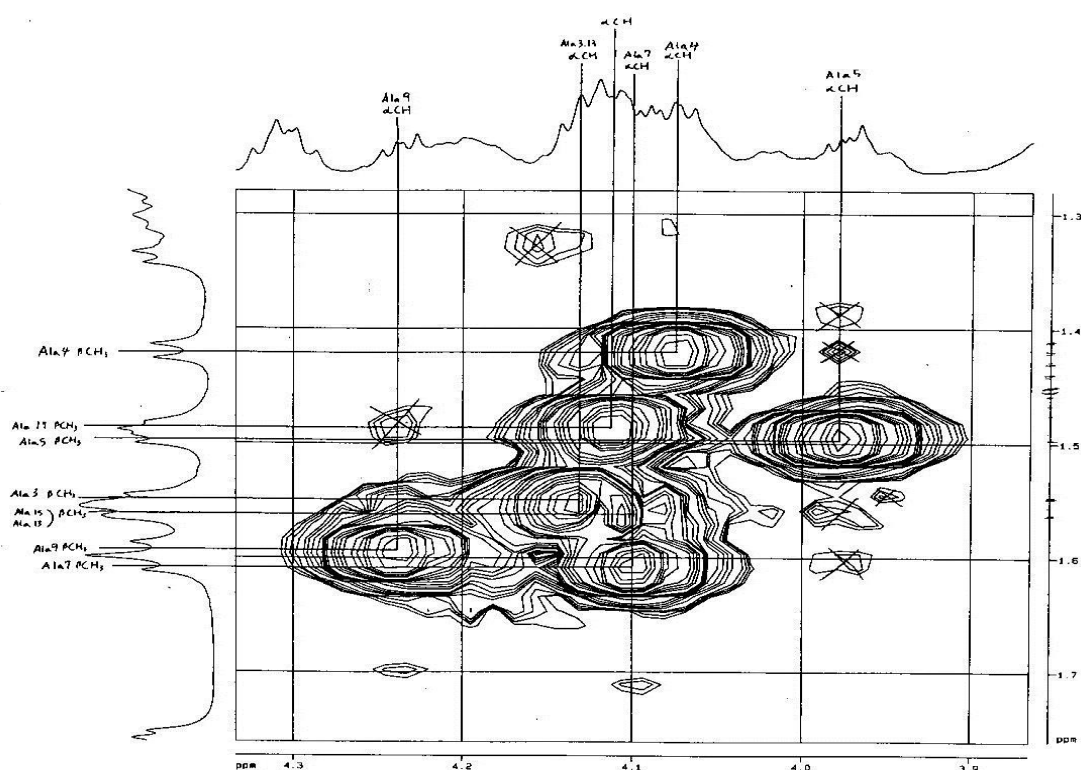

**Figure S8E:**  $^1\text{H}$ ,  $^1\text{H}$  COSY spectrum of the monoacetate, in which the proton spin–spin couplings for  $\alpha\text{CH}/\beta\text{CH}$  found in Ala residues are highlighted.

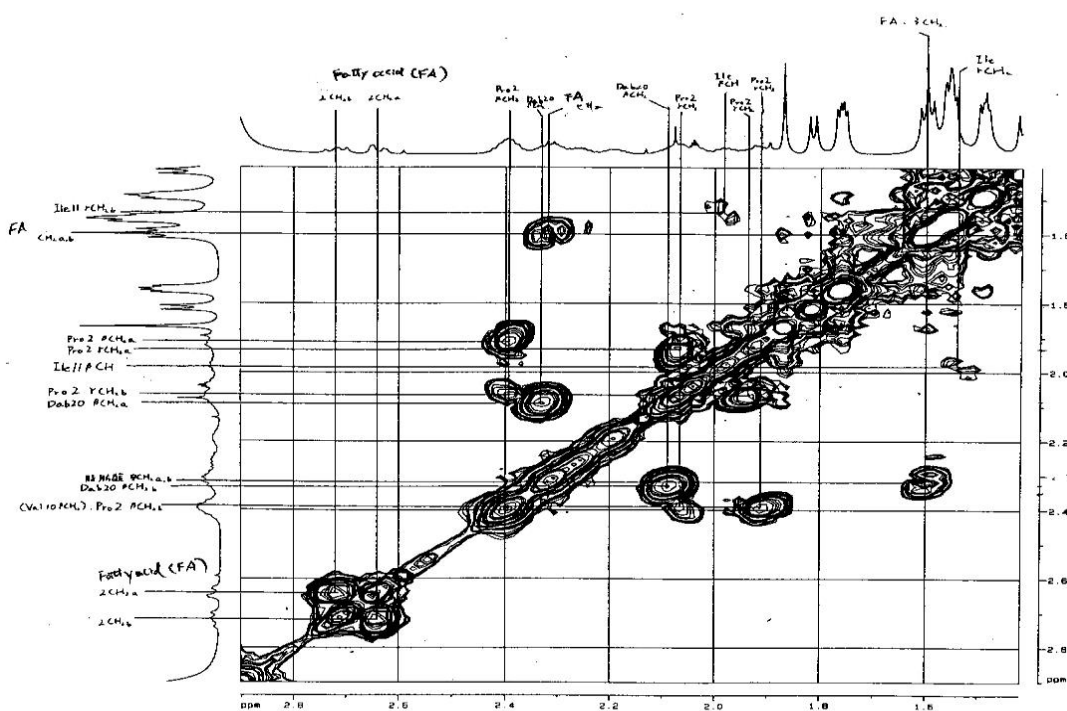

**Figure S8F:**  $^1\text{H}$ ,  $^1\text{H}$  COSY spectrum of the monoacetate, in which the proton spin–spin couplings for  $\beta\text{CH}/\gamma\text{CH}$  of Pro, Dab and Ile residues are highlighted.

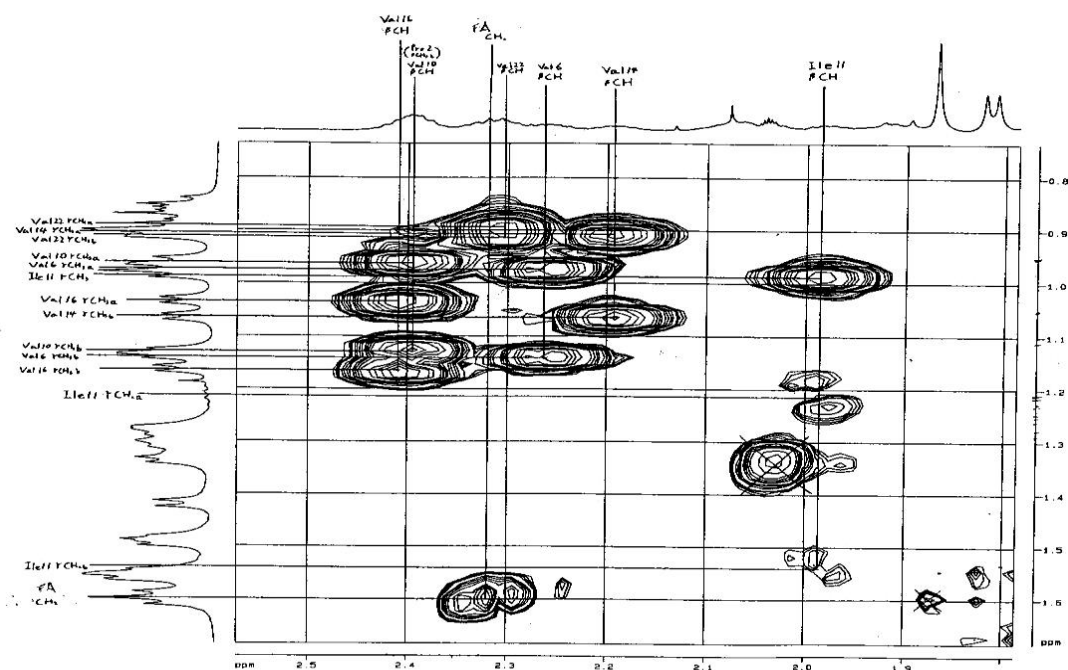

**Figure S8G:**  $^1\text{H}$ ,  $^1\text{H}$  COSY spectrum of the monoacetate, in which the proton spin–spin couplings for  $\beta\text{CH}/\gamma\text{CH}$  of Val residues are highlighted.

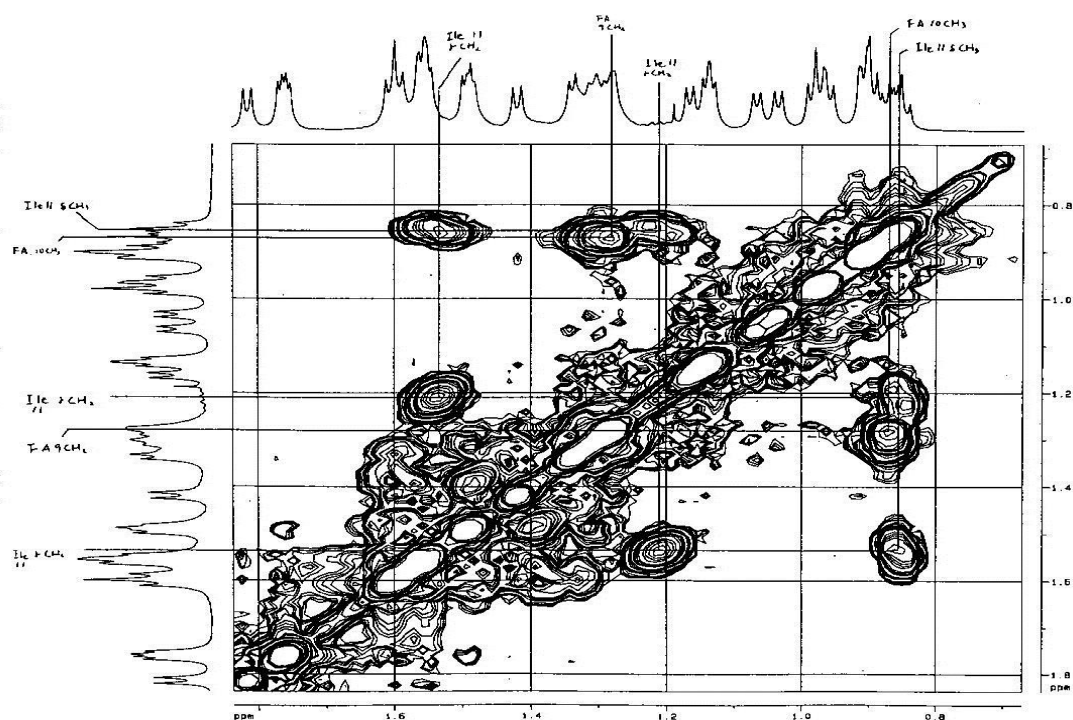

**Figure S8H:**  $^1\text{H}$ ,  $^1\text{H}$  COSY spectrum of the monoacetate, in which the proton spin–spin couplings for  $\gamma\text{CH}/\delta\text{CH}$  of Ile residue are highlighted.



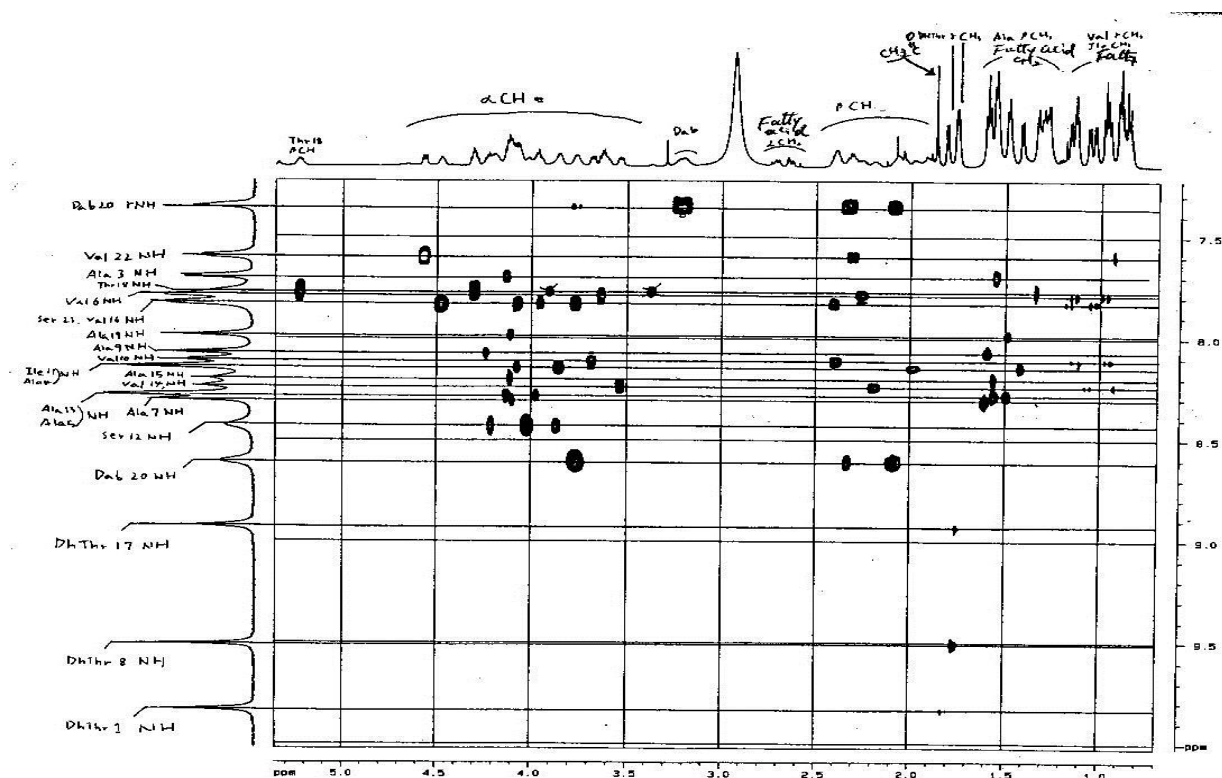

**Figure S9:** TOCSY spectrum of cicorinotoxin monoacetate (600 MHz, acetone  $d_6$ ), in which TOCSY cross peaks from amide protons are highlighted.

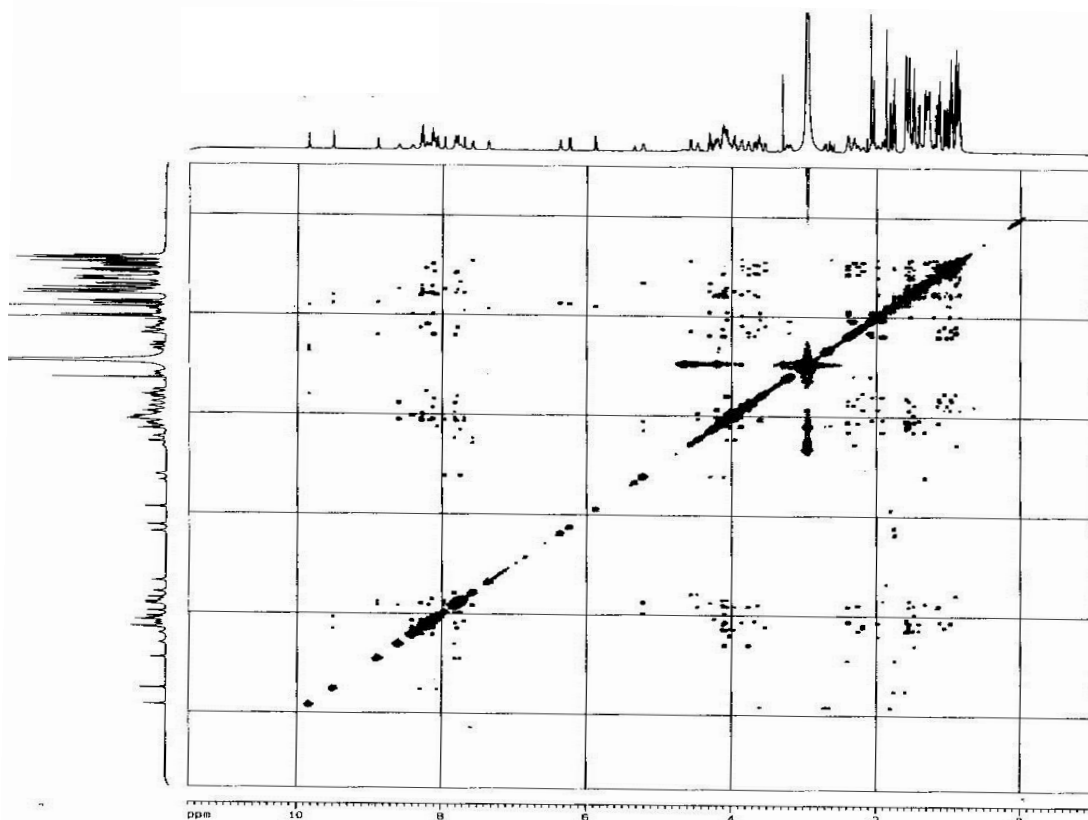

**Figure S10A:** NOESY spectrum (overall region).





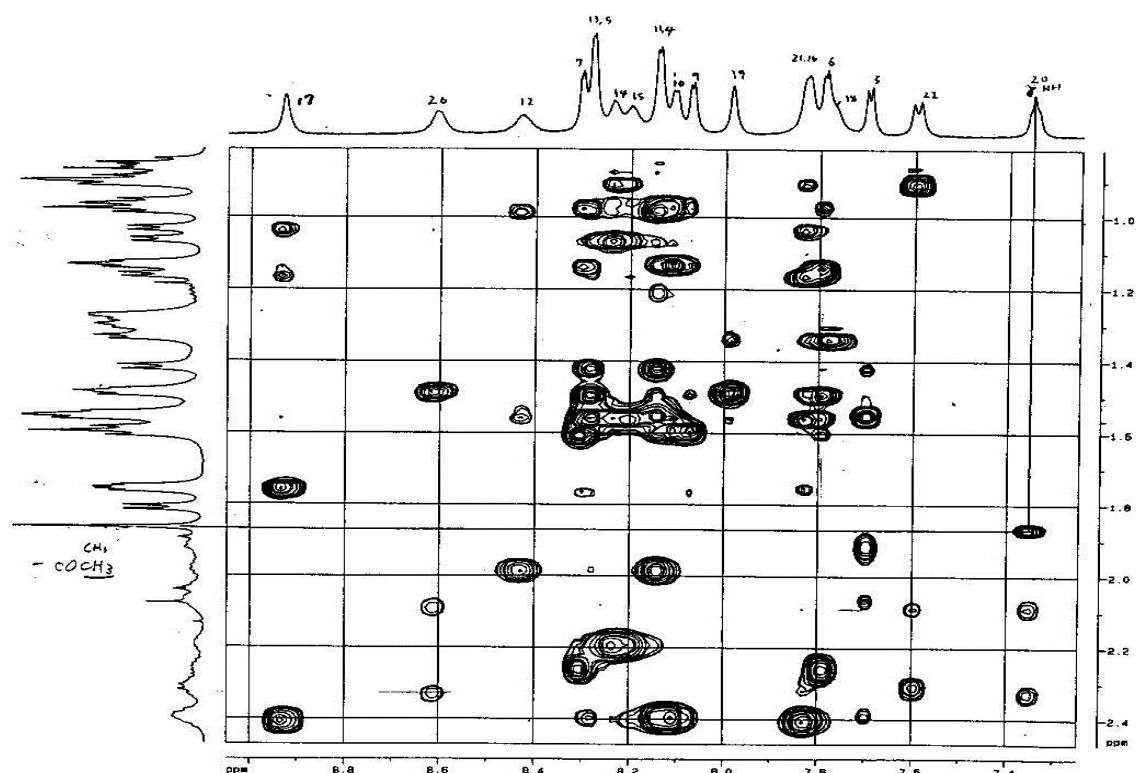

**Figure S10F:** NOESY spectrum; the cross peaks of  $\beta\text{C}^i\text{H}/\alpha\text{N}^{i+1}\text{H}$  are highlighted. The NOE between  $\gamma\text{NH}$  of Dab and the acetyl Me of the monoacetate was clearly observed, indicating the Ac is positioned at Dab.

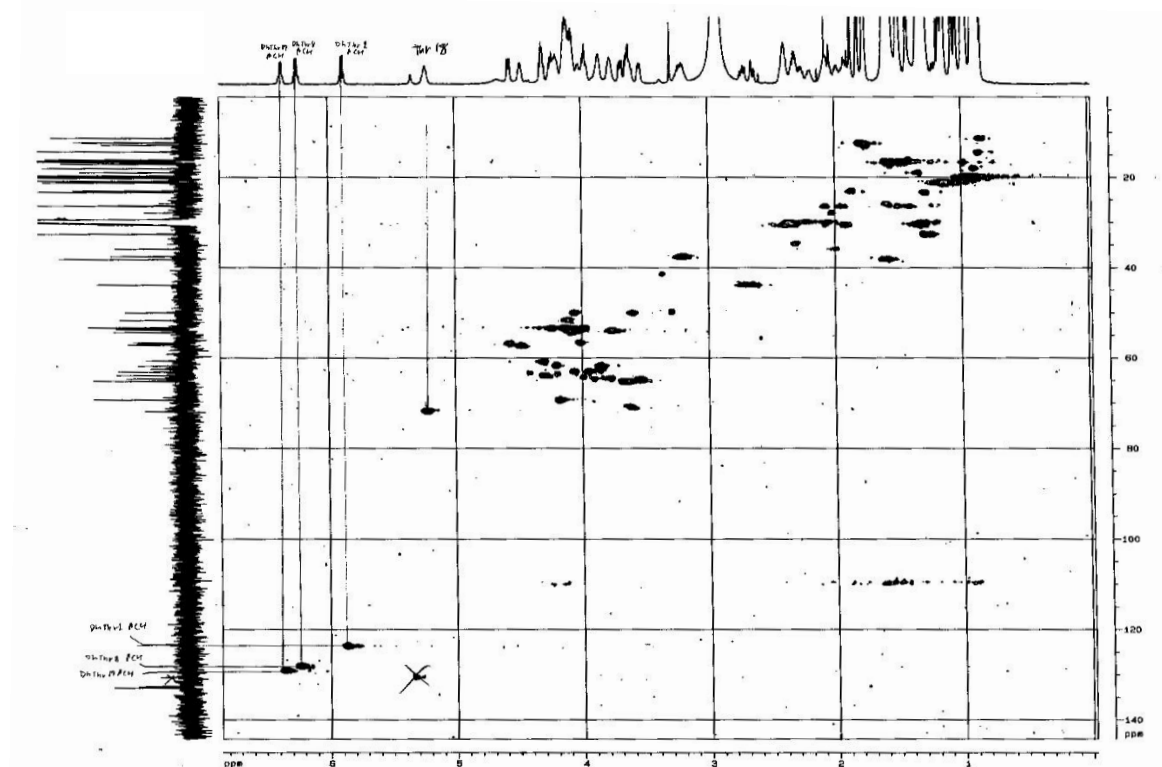

**Figure S11:** HMQC spectrum of the monoacetate (overall region).



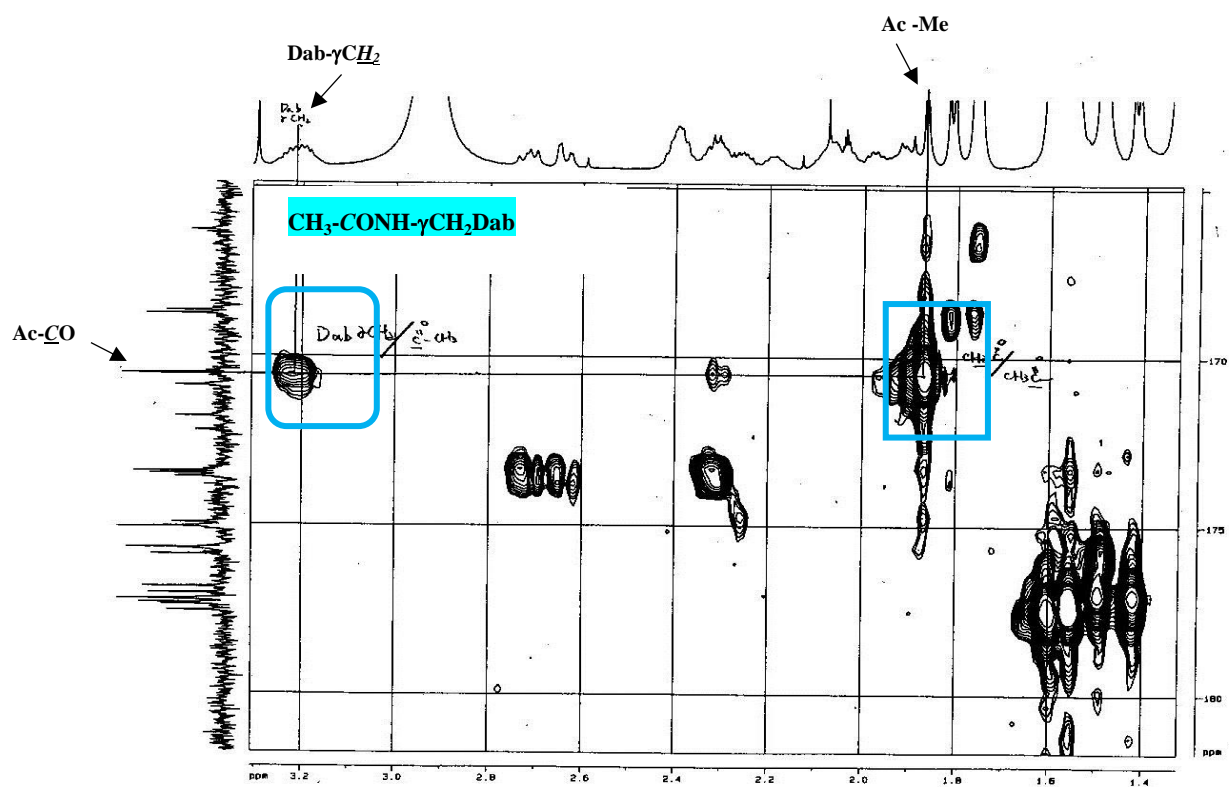

**Figure S12C:** HMBC spectrum for the assignment of acetyl Me signal of the monoacetate.

**Table S1:**  $^1\text{H}$  NMR data of cichorinotoxin monoacetate in acetone- $d_6$  (600 MHz).

The multiplicity and coupling constants ( $J$ , Hz) are given only for the protons that were clearly observed, but for other protons, whose multiplicities are not clear, the chemical shifts only are given.

| AA                 | NH                   | $\alpha$                    | $\beta$                                        | $\gamma$                                                                       | $\delta$                                      | others |
|--------------------|----------------------|-----------------------------|------------------------------------------------|--------------------------------------------------------------------------------|-----------------------------------------------|--------|
| DhThr <sup>1</sup> | 9.83 (s)             | —                           | 5.89 (q, $J=7.0$ Hz)                           | $\underline{\text{CH}}_3$ 1.82 (d, $J=7.0$ Hz)                                 | —                                             |        |
| Pro <sup>2</sup>   | —                    | 4.31                        | $\underline{\text{CH}}_2$ 1.91, 2.39           | $\underline{\text{CH}}_2$ 2.06, 1.96                                           | $\underline{\text{CH}}_2$ 4.06; 3.60          |        |
| Ala <sup>3</sup>   | 7.70 (d, $J=6.1$ Hz) | 4.12                        | $\underline{\text{CH}}_3$ 1.55                 | —                                                                              | —                                             |        |
| Ala <sup>4</sup>   | 8.14 (d, $J=3.3$ Hz) | 4.06                        | $\underline{\text{CH}}_3$ 1.42 (d, $J=7.2$ Hz) | —                                                                              | —                                             |        |
| Ala <sup>5</sup>   | 8.28                 | 3.97                        | $\underline{\text{CH}}_3$ 1.50 (d, $J=7.2$ Hz) | —                                                                              | —                                             |        |
| Val <sup>6</sup>   | 7.79                 | 3.62 (m)                    | 2.26 (m)                                       | $\underline{\text{CH}}_3$ 0.98 (d, $J=7.0$ Hz); $\underline{\text{CH}}_3$ 1.14 | —                                             |        |
| Ala <sup>7</sup>   | 8.30                 | 4.09                        | 1.61 (d, $J=7.3$ Hz)                           | —                                                                              | —                                             |        |
| DhThr <sup>8</sup> | 9.51 (s)             | —                           | 6.24 (q, $J=7.0$ Hz)                           | $\underline{\text{CH}}_3$ 1.76 (d, $J=7.0$ Hz)                                 | —                                             |        |
| Ala <sup>9</sup>   | 8.07 (d, $J=3.5$ Hz) | 4.23                        | $\underline{\text{CH}}_3$ 1.59 (d, $J=7.3$ Hz) | —                                                                              | —                                             |        |
| Val <sup>10</sup>  | 8.10 (d, $J=3.5$ Hz) | 3.68 (dd, $J=10.4, 5.4$ Hz) | 2.39                                           | $\underline{\text{CH}}_3$ 0.96; $\underline{\text{CH}}_3$ 1.12                 | —                                             |        |
| Ile <sup>11</sup>  | 8.14 (d, $J=3.3$ Hz) | 3.85 (bs)                   | 1.98 (m)                                       | $\underline{\text{CH}}_3$ 0.99<br>$\underline{\text{CH}}_2$ 1.22; 1.54         | $\underline{\text{CH}}_3$ 0.85(t, $J=7.3$ Hz) |        |
| Ser <sup>12</sup>  | 8.42 (bs)            | 4.01                        | 3.87, 4.22                                     | —                                                                              | —                                             |        |
| Ala <sup>13</sup>  | 8.28                 | 4.12                        | $\underline{\text{CH}}_3$ 1.57                 | —                                                                              | —                                             |        |
| Val <sup>14</sup>  | 8.24 (bs)            | 3.53 (dd,                   | 2.19 (m)                                       | $\underline{\text{CH}}_3$ 0.91;                                                | —                                             |        |

|                     |                         |                                  |                                            |                                                                                           |   |                                                  |
|---------------------|-------------------------|----------------------------------|--------------------------------------------|-------------------------------------------------------------------------------------------|---|--------------------------------------------------|
|                     |                         | $J=10.0, 4.9$<br>Hz)             |                                            | $\underline{CH_3}$ 1.07 (d,<br>$J=6.3$ Hz)                                                |   |                                                  |
| Ala <sup>15</sup>   | 8.20 (bs)               | 4.10                             | $\underline{CH_3}$ 1.57                    | —                                                                                         | — |                                                  |
| Val <sup>16</sup>   | 7.83                    | 3.76                             | 2.41                                       | $\underline{CH_3}$ 1.03 (d,<br>$J=6.5$ Hz);<br>$\underline{CH_3}$ 1.16 (d,<br>$J=6.5$ Hz) | — |                                                  |
| DhThr <sup>17</sup> | 8.93 (s)                | —                                | 6.37 (q, $J=7.0$<br>Hz)                    | $\underline{CH_3}$ 1.75<br>(d, $J=7.0$ Hz)                                                | — |                                                  |
| Thr <sup>18</sup>   | 7.78 (s)                | 4.29 (m)                         | 5.23 (m)                                   | $\underline{CH_3}$ 1.34 (d,<br>$J=6.0$ Hz)                                                |   |                                                  |
| Ala <sup>19</sup>   | 7.98 (bs)               | 4.10                             | $\underline{CH_3}$ 1.48 (d,<br>$J=7.2$ Hz) | —                                                                                         | — |                                                  |
| Dab <sup>20</sup>   | 8.61 (bs)               | 3.76                             | 2.33 (m, 1H);<br>2.08 (m, 1H)              | $\underline{CH_2}$ 3.21 (m,<br>2H)                                                        | — | $\gamma NH$ 7.35<br>(bs)<br>$COCH_3$<br>1.87 (s) |
| Ser <sup>21</sup>   | 7.82                    | 4.46 (m)                         | 3.94; 4.05                                 | —                                                                                         | — |                                                  |
| Val <sup>22</sup>   | 7.60 (d,<br>$J=9.0$ Hz) | 4.56 (dd,<br>$J=9.6, 3.8$<br>Hz) | 2.31                                       | $\underline{CH_3}$<br>0.87;0.91                                                           | — |                                                  |

\* The <sup>1</sup>H NMR data of the fatty acid moiety is described in Figure 3 (main Text).

**Table S2:** <sup>13</sup>C NMR data of cichorinotoxin monoacetate in acetone-*d*<sub>6</sub> (150 MHz).

| AA                 | CO                     | $\alpha$                  | $\beta$                  | $\gamma$                          | $\delta$    | Others |
|--------------------|------------------------|---------------------------|--------------------------|-----------------------------------|-------------|--------|
| DhThr <sup>1</sup> | 168.77 (s)             | 132.8 (s)                 | 123.3<br>(d)             | 12.28 (q) <sup>g</sup>            | —           |        |
| Pro <sup>2</sup>   | 175.76(s) <sup>l</sup> | 60.6 (t)                  | 30.58<br>(t)             | 26.4 (t)                          | 49.9<br>(t) |        |
| Ala <sup>3</sup>   | <i>j</i>               | <i>b</i>                  | h ( $\underline{CH_3}$ ) | —                                 | —           |        |
| Ala <sup>4</sup>   | 177.07                 | <i>b</i>                  | 16.1 (q)                 | —                                 | —           |        |
| Ala <sup>5</sup>   | 176.88                 | <i>b</i>                  | h ( $\underline{CH_3}$ ) | —                                 | —           |        |
| Val <sup>6</sup>   | 175.9 (s)              | 65.09<br>(d) <sup>d</sup> | <i>f</i>                 | $\gamma CH_3$ : 19.9<br>(q); 21.2 |             |        |



|                     |                                 |                        |                                     |                                                   |          |                                                                                            |
|---------------------|---------------------------------|------------------------|-------------------------------------|---------------------------------------------------|----------|--------------------------------------------------------------------------------------------|
|                     |                                 |                        |                                     | (q)                                               |          |                                                                                            |
| Ala <sup>7</sup>    | <i>j</i>                        | <i>b</i>               | h ( <u>CH</u> <sub>3</sub> )        | —                                                 | —        |                                                                                            |
| DhThr <sup>8</sup>  | 168.67 (s)                      | 132.6 (s) <sup>a</sup> | 128.2 (d)                           | 12.37 (q) <sup>g</sup>                            | —        |                                                                                            |
| Ala <sup>9</sup>    | 177.57                          | 53.5 (d)               | h ( <u>CH</u> <sub>3</sub> )        | —                                                 | —        |                                                                                            |
| Val <sup>10</sup>   | 175.1(s) <sup>k</sup>           | 65.10 (d) <sup>d</sup> | <i>f</i>                            | <i>i</i>                                          |          |                                                                                            |
| Ile <sup>11</sup>   | 173.4 (s) <sup>n</sup>          | 62.4 (d)               | 35.9 (d)                            | 26.2 (d), 16.75 (γ CH <sub>3</sub> ) <sup>o</sup> | 11.3 (q) |                                                                                            |
| Ser <sup>12</sup>   | 174.9 (s) <sup>n</sup>          | 56.6 (d)               | 61.8 (t)                            | —                                                 | —        |                                                                                            |
| Ala <sup>13</sup>   | <i>j</i>                        | <i>b</i>               | <i>h</i> ( <u>CH</u> <sub>3</sub> ) | —                                                 | —        |                                                                                            |
| Val <sup>14</sup>   | 175.1(s) <sup>k</sup>           | 64.6 (d) <sup>c</sup>  | <i>f</i>                            | <i>i</i>                                          |          |                                                                                            |
| Ala <sup>15</sup>   | <i>j</i>                        | <i>b</i>               | h (CH <sub>3</sub> )                | —                                                 | —        |                                                                                            |
| Val <sup>16</sup>   | <i>m</i>                        | 64.6 (d) <sup>c</sup>  | <i>f</i>                            | <i>i</i>                                          |          |                                                                                            |
| DhThr <sup>17</sup> | 166.3(s)                        | 132.5 (s) <sup>a</sup> | 129.3(d )                           | 12.8 (q)                                          | —        |                                                                                            |
| Thr <sup>18</sup>   | 172.2 (s)                       | 63.8 (d)               | 71.8 (d)                            | 18.9 (q)                                          | —        |                                                                                            |
| Ala <sup>19</sup>   | 175.72 (s) <sup>l</sup>         | 51.7 (d)               | <i>h</i> ( <u>CH</u> <sub>3</sub> ) | —                                                 | —        |                                                                                            |
| Dab <sup>20e</sup>  | <i>m</i>                        | <i>b</i>               | <i>f</i>                            | 37.5 (t)                                          | —        | <u>CO</u> CH <sub>3</sub> 170.53 (or 170.54) <sup>e</sup> ; <u>CO</u> CH <sub>3</sub> 23.0 |
| Ser <sup>21</sup>   | 170.9 (s)                       | 57.1 (d)               | 63.1 (t)                            | —                                                 | —        |                                                                                            |
| Val <sup>22</sup>   | 170.53 (or 170.54) <sup>e</sup> | 56.9 (d)               | 30.45 (t)                           | γ <u>CH</u> <sub>3</sub> : 18.0 (q); 20.2 (q)     | —        |                                                                                            |

*a*: The chemical shifts of *a* may be exchangeable due to closely spaced peaks.

*b*. Assignments of each of *b* peaks were unsuccessful, because these peaks were closely spaced peaks: δ<sub>C</sub> (ppm) 53.28, 53.30, 53.37, 53.71, 53.76, 53.81, 54.33.

*c*: the two carbon signals were overlapped.

*d*: The chemical shifts of *a* may be exchangeable due to closely spaced peaks.

*e*: δ<sub>NH</sub>-COCH<sub>3</sub>. The chemical shifts of CH<sub>3</sub> was 23.0 ppm, and that of CO was assigned to be either 170.53 or 170.54.

*f*. The carbon signals (CH) at β-position of Val moieties were buried in the large solvent peaks (acetone-*d*<sub>6</sub>) that appeared around 29.8 ppm, thus, the exact chemical shifts were

not given.

*g*: exchangeable.

*h*: The Me signals, which are assigned to be Ala  $\beta\text{CH}_3$ , were resonated at  $\delta_{\text{C}}$  (ppm) 16.1, 16.3, 16.43, 16.47, 16.59, 16.63 and 17.1. The signal peak at  $\delta_{\text{C}}$  16.63 was larger (ca, twice) than those of other Ala  $\beta\text{CH}_3$ , indicating that two Ala $\beta\text{CH}_3$  carbon signals were overlapped.

*i*: The Me signals were resonated at  $\delta_{\text{C}}$  (ppm) 19.67, 19.70, 19.73, 19.8 and 20.2. These carbon signals (Val  $\gamma\text{CH}_3$ ) were not differentiated due to the closed peaks in the HMBC spectrum.

*j*: The carbonyl carbons of 8 Ala moieties were found at  $\delta_{\text{C}}$  (ppm) 177.57, 177.40, 177.35, 177.24, 177.07 and 176.88. The 6 carbonyl carbon signals were observed, indicating that the other 2 carbons were overlapped at the above-mentioned CO signals.  $\delta_{\text{C}}$  176.88 was confirmed to be  $\text{CO}$  of Ala 5 by a clear HMBC cross peak between  $\alpha\text{CH}$  of Ala 5 and the carbonyl signal. The signal  $\delta_{\text{C}}$  177.07 was assigned to be  $\text{CO}$  of Ala 4, because clear HMBC cross peak was observed between  $\beta\text{CH}_3$  of Ala 4 and  $\delta_{\text{C}}$  177.07. The signal  $\delta_{\text{C}}$  177.57 was assigned to be  $\text{CO}$  of Ala 9, because clear HMBC cross peak was observed between  $\alpha\text{CH}$  of Ala 9 and  $\delta_{\text{C}}$  177.57. Assignments of other *j* peaks were unsuccessful, because these peaks were closely situated.

*k*: The two peaks were overlapped.

*l*: exchangeable due to the closely spaced signals

*m*: the two carbonyl carbons were invisible in the  $^{13}\text{C}$  NMR and in the HMBC spectrum, thus the  $\delta_{\text{C}}$  (ppm) of the two carbons were not given.

*n*: Remark:  $\alpha\text{CH}$  proton of Ser12 had unambiguous HMBC cross peaks for the two carbonyl carbons at 174.9 and 173.7 ppm. Observation of the HMBC correlations of  $\alpha\text{CH}$  and  $\beta\text{CH}$  of Ser 12 for the carbon signal at 174.9 ppm, but no cross peak for the carbon at 173.4 ppm, enabling the differentiation between the assignments of the carbonyl groups of Ile11 and Ser 12.

*o*: the assignment was confirmed by a clear HMBC cross peak between Ile11 $\alpha\text{CH}$  proton and the carbon signal at  $\delta_{\text{C}}$  16.75.

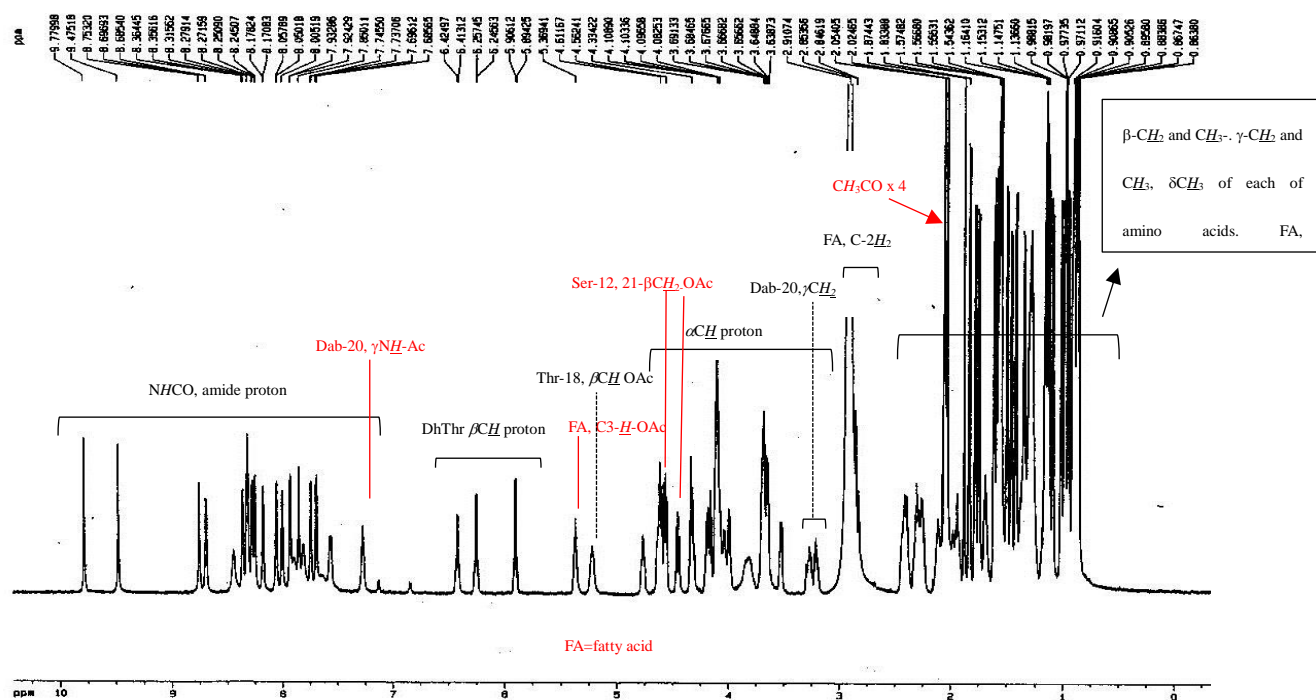

**Figure S13A:**  $^1\text{H}$  NMR spectrum of cichorinotoxin tetraacetate (600 MHz, acetone- $d_6$  overall spectrum).

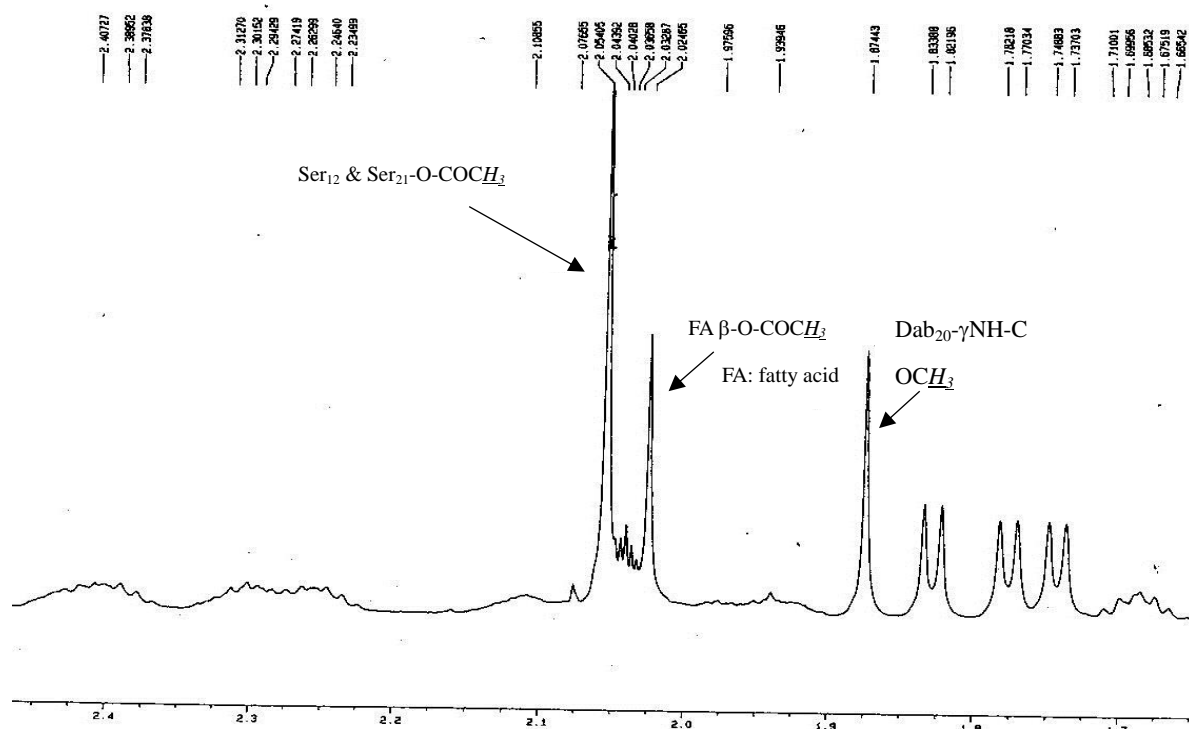

**Figure S13B:**  $^1\text{H}$  NMR spectrum of cichorinotoxin tetraacetate (acetyl protons region).

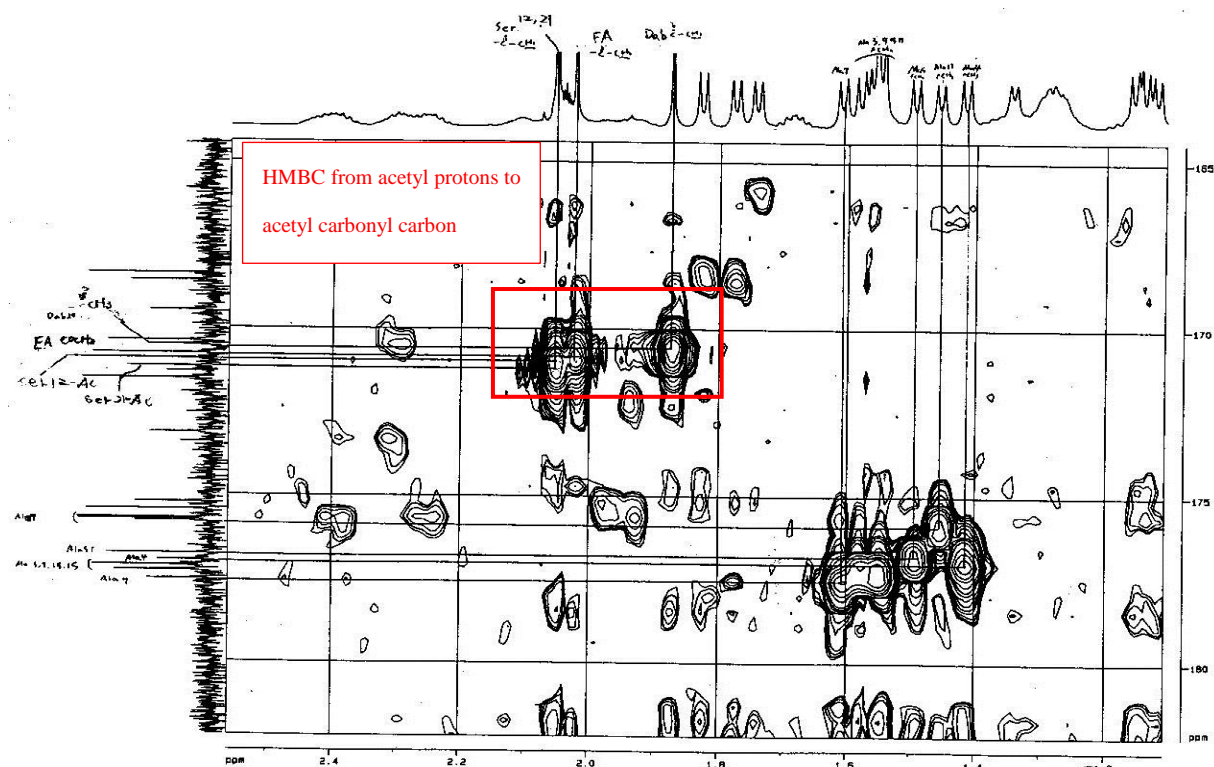

**Figure S13C:** HMBC spectrum of the tetraacetate: the HMBC cross peaks from acetyl Me proton to acetyl carbon are highlighted).

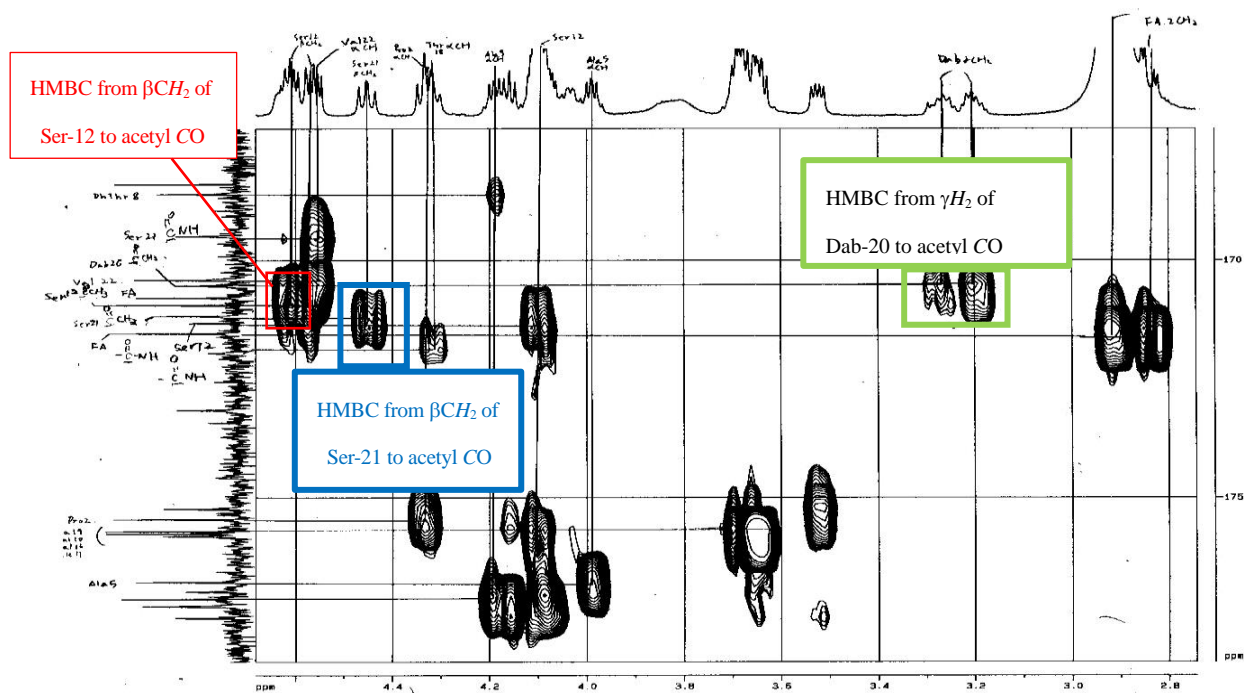

**Figure S13D:** HMBC spectrum of the tetraacetate: the HMBC data indicated that the OH groups of Ser-12, Ser-21 and  $\gamma$ -NH<sub>2</sub> group of Dab-20 were acetylated.

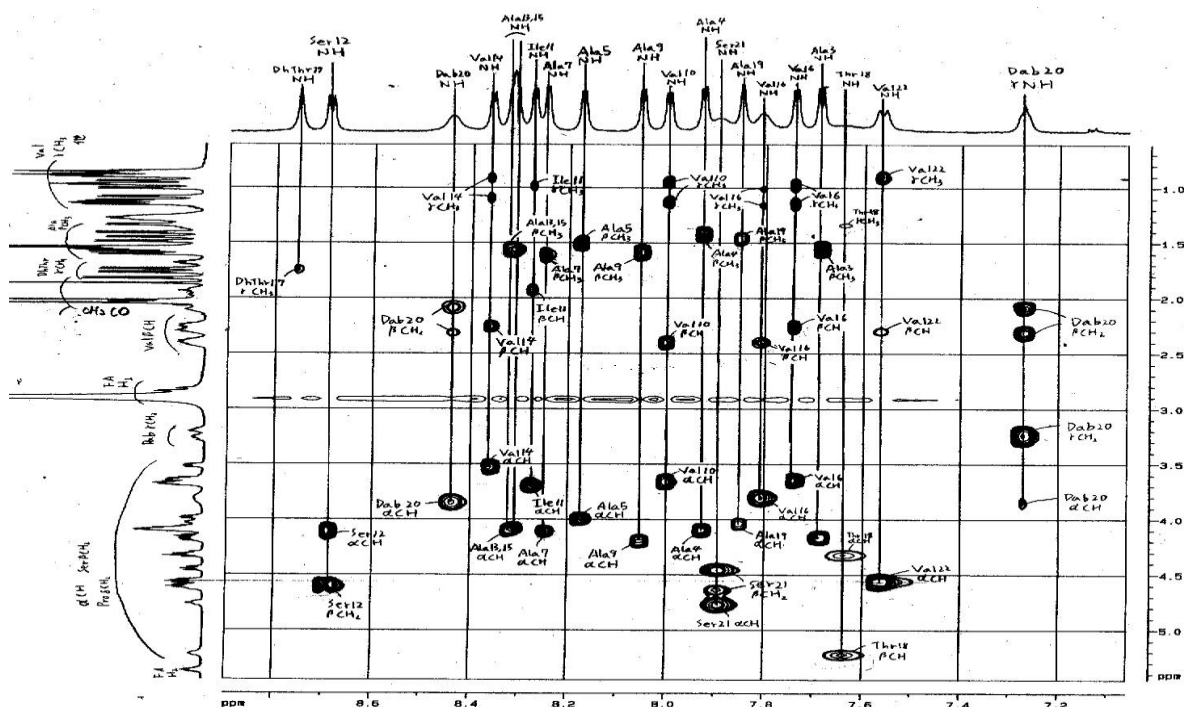

**Figure S13E:** TOCSY spectrum of the tetraacetate, where the TOCSY correlations from the amide NH protons to aliphatic methyl protons are highlighted.

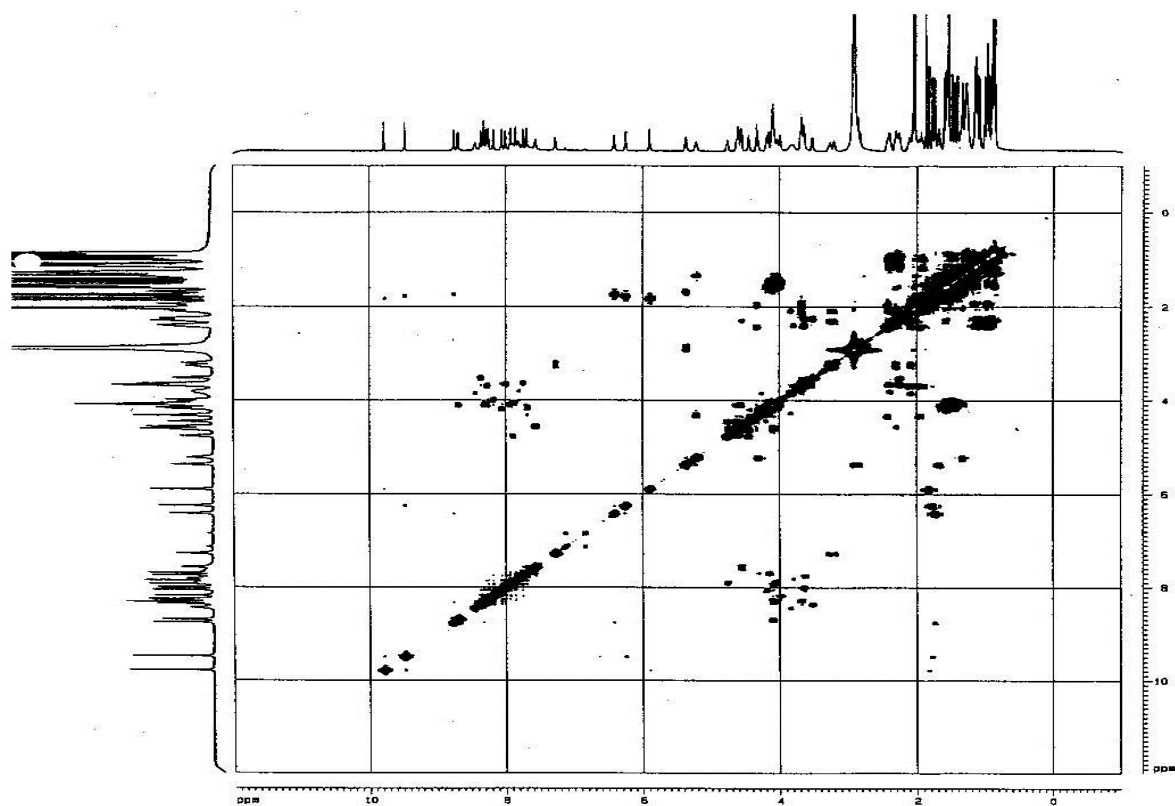

**Figure S13F:** <sup>1</sup>H, <sup>1</sup>H COSY spectrum of the tetraacetate (overall region).

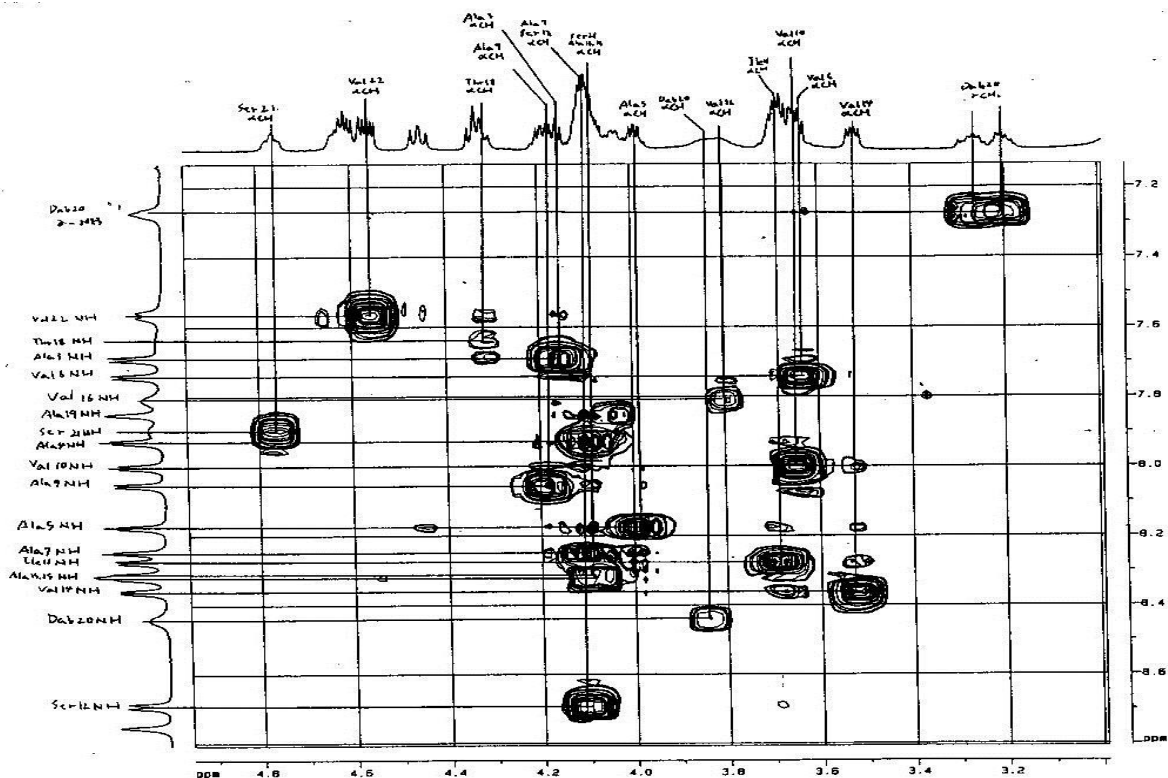

**Figure S13G:**  $^1\text{H}$ ,  $^1\text{H}$  COSY spectrum of the tetracetate ( $\text{N}^{\text{H}}/\text{C}^{\alpha}\text{H}$  cross peaks regions are highlighted).

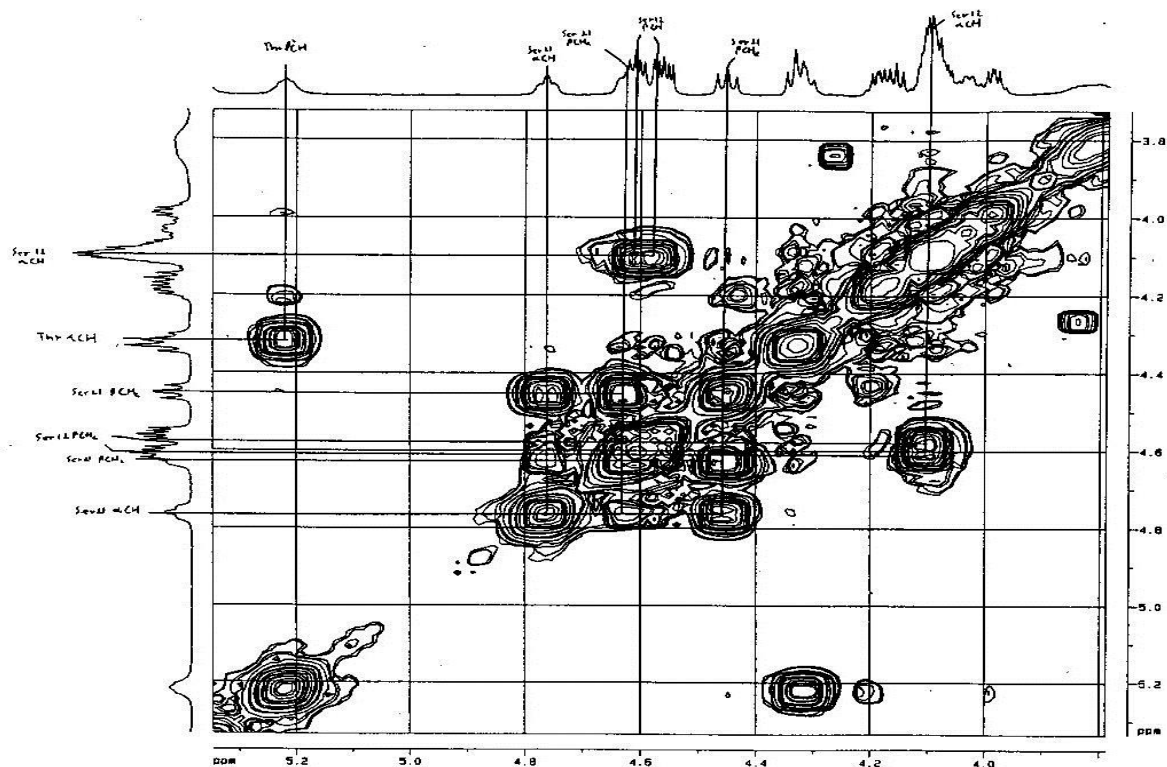

**Figure S13H:**  $^1\text{H}$ ,  $^1\text{H}$  COSY spectrum of the tetracetate (the cross peaks of  $\text{C}^{\alpha}\text{H}/\text{C}^{\beta}\text{H}$  of Ser and Thr are highlighted).

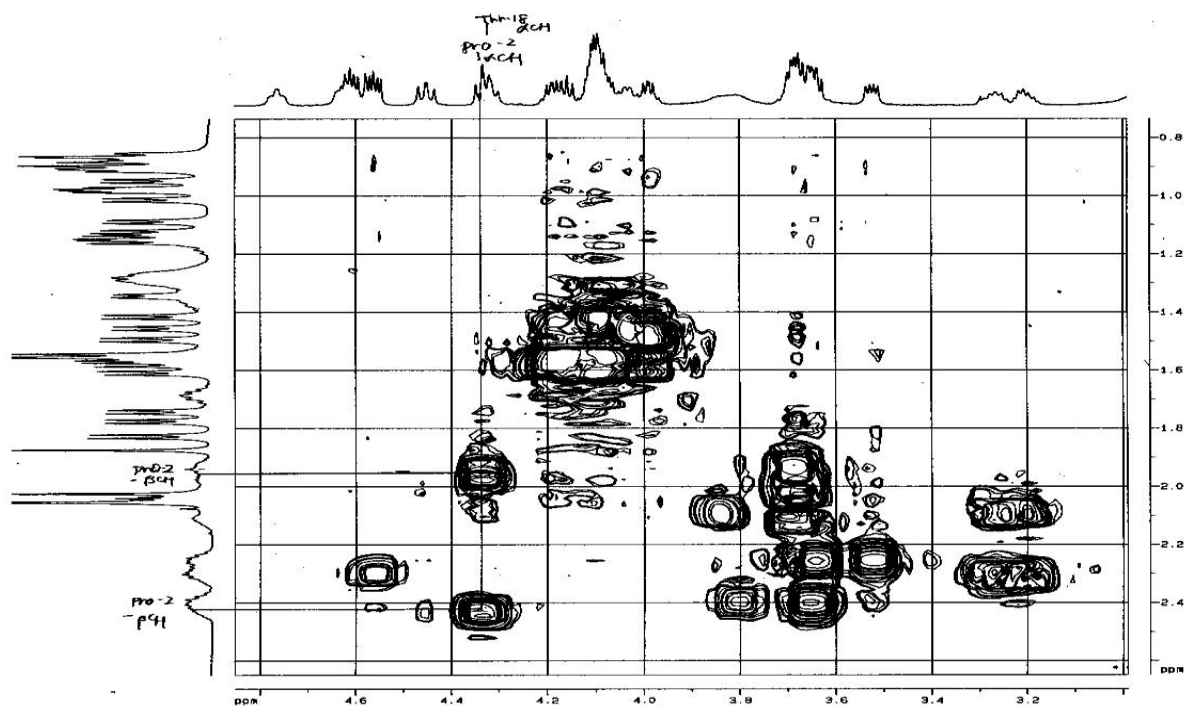

**Figure S13I:**  $^1\text{H}$ ,  $^1\text{H}$  COSY spectrum of the tetracetate (the cross peaks of  $\text{C}\alpha^1\text{H}/\text{C}\beta^1\text{H}$  of Pro-2 are highlighted).

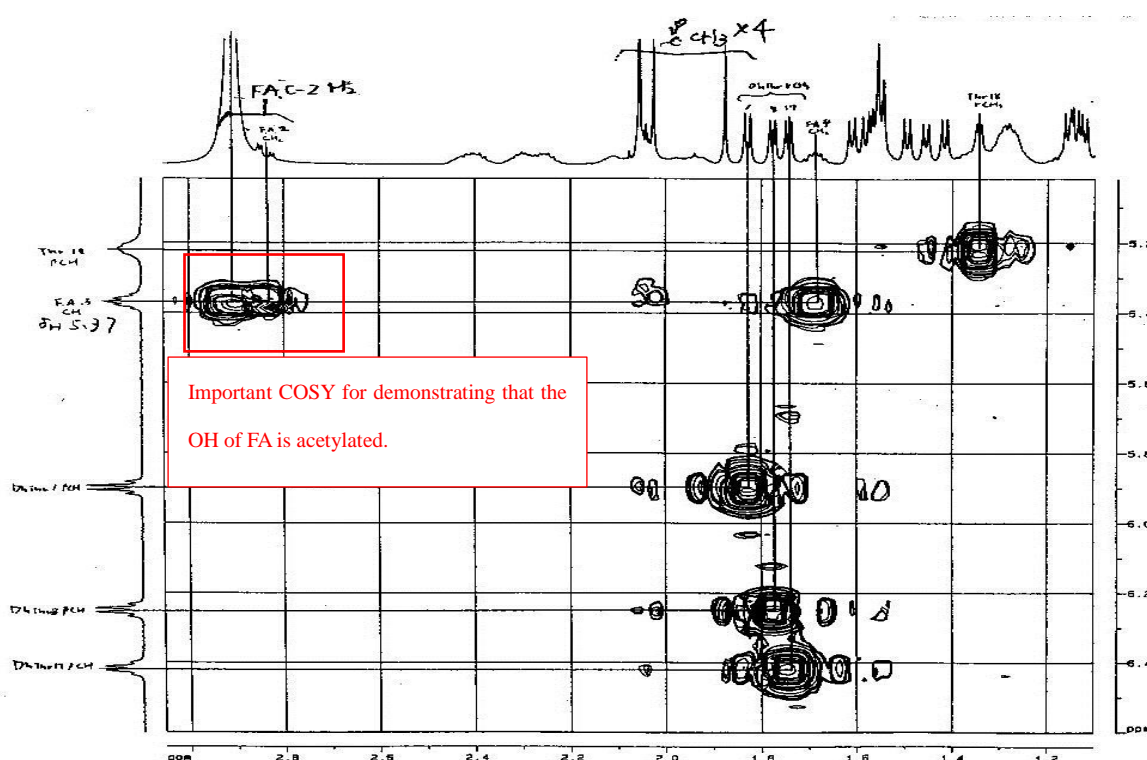

**Figure S13J:**  $^1\text{H}$ ,  $^1\text{H}$  COSY spectrum of the tetracetate (the cross peaks of DhThr  $\beta\text{-Me}/\beta\text{-CH}$  are highlighted). The clear COSY cross peak of FA C-2  $\text{CH}_2$ / FA C-3 CH enabled the assignment of FA C-3 CH ( $\delta_{\text{H}}$  5.37), demonstrating that the OH of FA was acetylated.







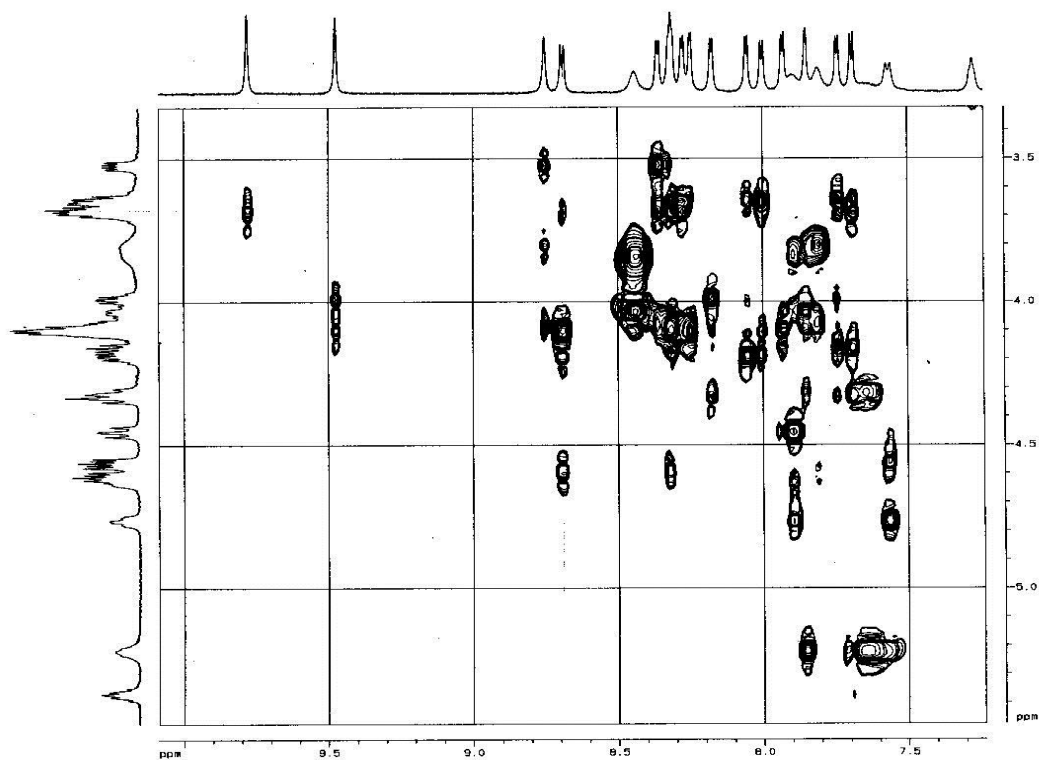

**Figure S13M:** NOESY correlations for  $\alpha\text{NH}/\alpha\text{CH}$ .

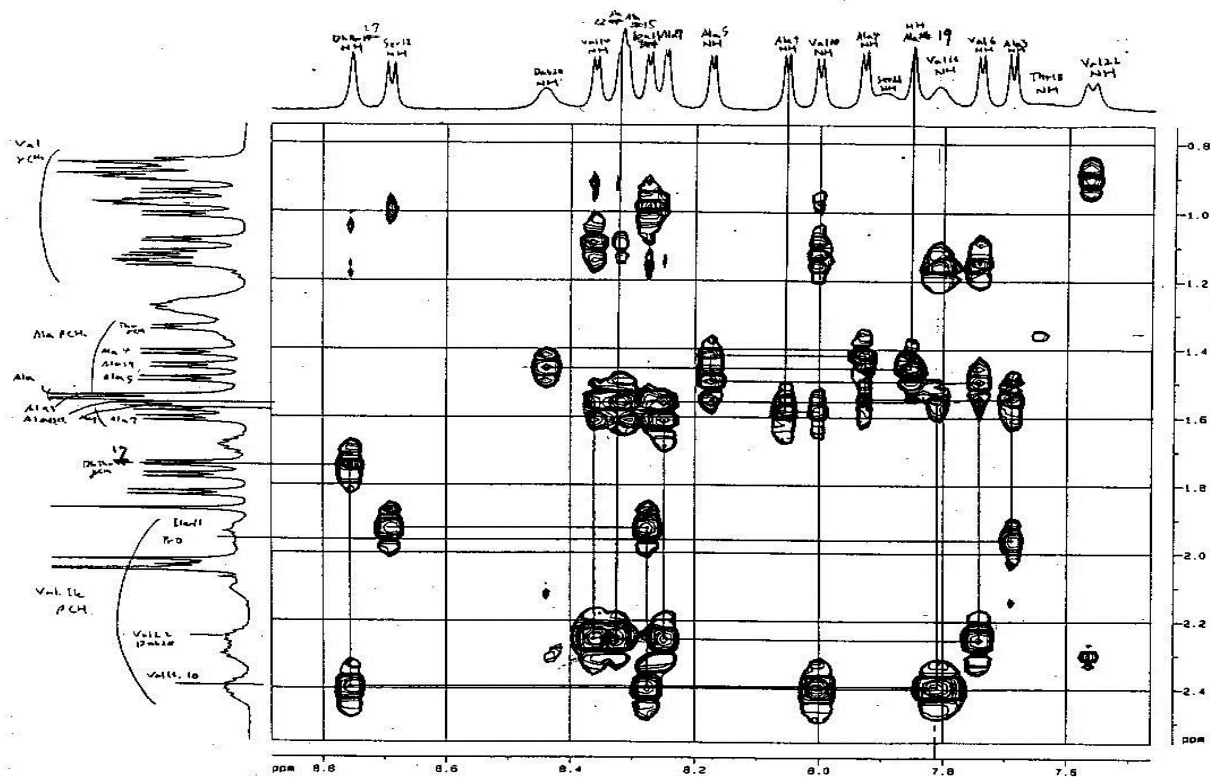

**Figure S13N:** NOESY correlations ( $\beta\text{CH}/\alpha\text{N}^{i+1}\text{H}$  cross peaks are highlighted).

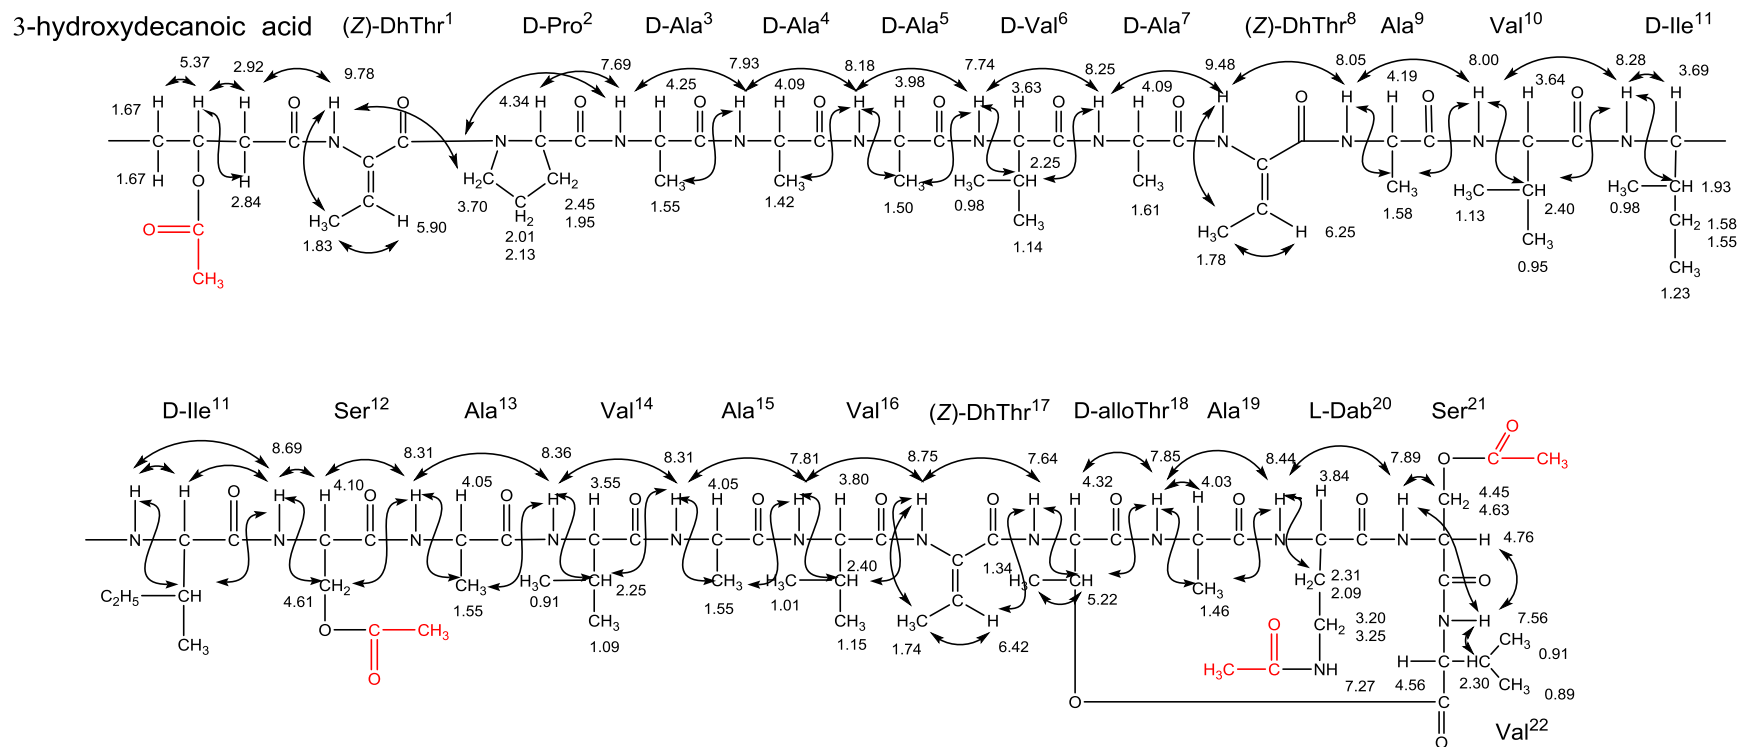

**Figure S 14:** Summarized NOE correlations and the <sup>1</sup>H-chemical shifts of the tetraacetate (600 MHz, acetone-*d*<sub>6</sub>). The NOE correlations are collected from the Figures S13K–S13M.

**Table S3:**  $^1\text{H}$  NMR chemical shifts of the tetraacetate in acetone- $d_6$  (600 MHz).

The multiplicity and coupling constants ( $J$ , Hz) are given only for the protons that were clearly observed, but for other protons, whose multiplicities are not clear, the chemical shifts only are given.

| AA                 | NH                   | $\alpha$                    | $\beta$                                        | $\gamma$                                                                       | $\delta$                       | others                                      |
|--------------------|----------------------|-----------------------------|------------------------------------------------|--------------------------------------------------------------------------------|--------------------------------|---------------------------------------------|
| DhThr <sup>1</sup> | 9.78 (s)             | —                           | 5.90 (q, $J=7.0$ Hz)                           | $\underline{\text{CH}}_3$ 1.83 (d, $J=7.0$ Hz)                                 | —                              |                                             |
| Pro <sup>2</sup>   | —                    | 4.34                        | $\underline{\text{CH}}_2$ 2.45, 1.95           | $\underline{\text{CH}}_2$ 2.01, 2.13                                           | $\underline{\text{CH}}_2$ 3.70 |                                             |
| Ala <sup>3</sup>   | 7.69 (d, $J=6.3$ Hz) | 4.25                        | $\underline{\text{CH}}_3$ 1.55                 | —                                                                              | —                              |                                             |
| Ala <sup>4</sup>   | 7.93 (d, $J=5.1$ Hz) | 4.09                        | $\underline{\text{CH}}_3$ 1.42 (d, $J=7.3$ Hz) | —                                                                              | —                              |                                             |
| Ala <sup>5</sup>   | 8.18 (d, $J=4.5$ Hz) | 3.99                        | $\underline{\text{CH}}_3$ 1.50 (d, $J=7.2$ Hz) | —                                                                              | —                              |                                             |
| Val <sup>6</sup>   | 7.74 (d, $J=5.1$ Hz) | 3.63 (m)                    | 2.25 (m)                                       | $\underline{\text{CH}}_3$ 0.98; $\underline{\text{CH}}_3$ 1.14                 | —                              |                                             |
| Ala <sup>7</sup>   | 8.25 (d, $J=3.5$ Hz) | 4.09                        | 1.61 (d, $J=7.2$ Hz)                           | —                                                                              | —                              |                                             |
| DhThr <sup>8</sup> | 9.48 (s)             | —                           | 6.25 (q, $J=7.0$ Hz)                           | $\underline{\text{CH}}_3$ 1.78 (d, $J=7.0$ Hz)                                 | —                              |                                             |
| Ala <sup>9</sup>   | 8.05 (d, $J=4.6$ Hz) | 4.19                        | $\underline{\text{CH}}_3$ 1.58 (d, $J=7.3$ Hz) | —                                                                              | —                              |                                             |
| Val <sup>10</sup>  | 8.00 (d, $J=5.5$ Hz) | 3.64                        | 2.40                                           | $\underline{\text{CH}}_3$ 0.95; $\underline{\text{CH}}_3$ 1.13                 | —                              |                                             |
| Ile <sup>11</sup>  | 8.28 (d, $J=4.5$ Hz) | 3.69                        | 1.94 (m)                                       | $\underline{\text{CH}}_3$ 0.98<br>$\underline{\text{CH}}_2$ 1.58; 1.55         | $\underline{\text{CH}}_3$ 0.98 |                                             |
| Ser <sup>12</sup>  | 8.69 (d, $J=6.9$ Hz) | 4.10                        | 4.61 (2H)                                      | —                                                                              | —                              | $\text{CO}\underline{\text{CH}}_3$ 2.08 (s) |
| Ala <sup>13</sup>  | 8.31                 | 4.05                        | $\underline{\text{CH}}_3$ 1.55                 | —                                                                              | —                              |                                             |
| Val <sup>14</sup>  | 8.36 (d, $J=5.0$ Hz) | 3.55 (dd, $J=10.0, 5.0$ Hz) | 2.25 (m)                                       | $\underline{\text{CH}}_3$ 0.91; $\underline{\text{CH}}_3$ 1.09 (d, $J=6.4$ Hz) | —                              |                                             |
| Ala <sup>15</sup>  | 8.31                 | 4.05                        | $\underline{\text{CH}}_3$ 1.57                 | —                                                                              | —                              |                                             |
| Val <sup>16</sup>  | 7.81 (bs)            | 3.80                        | 2.40                                           | $\underline{\text{CH}}_3$ 1.01; —                                              | —                              |                                             |

|                     |                            |          |                                                  |                                                  |   |                                                            |
|---------------------|----------------------------|----------|--------------------------------------------------|--------------------------------------------------|---|------------------------------------------------------------|
|                     |                            |          |                                                  | <u>CH<sub>3</sub></u> 1.15                       |   |                                                            |
| DhThr <sup>17</sup> | 8.75 (s)                   | —        | 6.42 (q, <i>J</i> =7.1 Hz)                       | <u>CH<sub>3</sub></u> 1.74 (d, <i>J</i> =7.1 Hz) | — |                                                            |
| Thr <sup>18</sup>   | 7.64 (very broad)          | 4.32 (m) | 5.22 (very broad)                                | <u>CH<sub>3</sub></u> 1.34                       |   |                                                            |
| Ala <sup>19</sup>   | 7.85 (s)                   | 4.09     | <u>CH<sub>3</sub></u> 1.45 (d, <i>J</i> =7.0 Hz) | —                                                | — |                                                            |
| Dab <sup>20</sup>   | 8.44 (bs)                  | 3.84     | 2.31 (m); 2.09 (m)                               | <u>CH<sub>2</sub></u> 3.20 (m); 3.25 (m)         | — | $\gamma$ NH 7.27 (bs)<br>CO <u>CH<sub>3</sub></u> 1.87 (s) |
| Ser <sup>21</sup>   | 7.89 (very broad)          | 4.76 (m) | 4.45; 4.63                                       | —                                                | — | CO <u>CH<sub>3</sub></u> 2.08 (s)                          |
| Val <sup>22</sup>   | 7.56 (d, <i>J</i> =8.5 Hz) | 4.56 (m) | 2.30                                             | <u>CH<sub>3</sub></u> 0.89; 0.91                 | — |                                                            |

\* The <sup>1</sup>H NMR chemical shifts of the fatty acid moiety were as follows. H-2,  $\delta_H$  2.84, 2.92; H-3,  $\delta_H$  5.37; H-4,  $\delta_H$  1.67 (2H); H-5,  $\delta_H$  1.27; H-6—H-8 not assignable; H-9,  $\delta_H$  1.28, 1.55; H-10 (Me),  $\delta_H$  0.87. CH<sub>3</sub>CO: acetyl proton  $\delta_H$  2.02 (see Fig. S13B).

**Table S4:** <sup>13</sup>C-NMR data of cichorinotoxin tetracetate in acetone-*d*<sub>6</sub> (150 MHz).

| AA                 | CO         | $\alpha$ | $\beta$  | $\gamma$                   | $\delta$ | Others |
|--------------------|------------|----------|----------|----------------------------|----------|--------|
| DhThr <sup>1</sup> | 168.39     | <i>f</i> | 123.43   | <i>g</i>                   | —        |        |
| Pro <sup>2</sup>   | 175.46     | <i>c</i> | 30.46    | 26.27                      | 49.80    |        |
| Ala <sup>3</sup>   | <i>k</i>   | <i>a</i> | <i>d</i> | —                          | —        |        |
| Ala <sup>4</sup>   | <i>k</i>   | <i>a</i> | <i>d</i> | —                          | —        |        |
| Ala <sup>5</sup>   | 176.79     | <i>a</i> | <i>d</i> | —                          | —        |        |
| Val <sup>6</sup>   | <i>j</i>   | 65.05    | <i>b</i> | <i>h; i</i>                |          |        |
| Ala <sup>7</sup>   | 177.54     | 54.31    | <i>d</i> | —                          | —        |        |
| DhThr <sup>8</sup> | 168.60 (s) | <i>f</i> | 128.00   | <i>g</i>                   | —        |        |
| Ala <sup>9</sup>   | <i>k</i>   | <i>a</i> | <i>d</i> | —                          | —        |        |
| Val <sup>10</sup>  | <i>j</i>   | 65.36    | <i>b</i> | <i>h; i</i>                |          |        |
| Ile <sup>11</sup>  | <i>j</i>   | <i>c</i> | 35.69    | CH <sub>2</sub> : <i>e</i> | 11.20    |        |

|                     |          |          |          | CH <sub>3</sub> : <i>d</i>                             | ( $\delta$<br>CH <sub>3</sub> ) |                                                                              |
|---------------------|----------|----------|----------|--------------------------------------------------------|---------------------------------|------------------------------------------------------------------------------|
| Ser <sup>12</sup>   | 171.32   | <i>a</i> | 62.02    | —                                                      | —                               | <u>CO</u> CH <sub>3</sub> : 170.94; CO_<br><u>CH</u> <sub>3</sub> : <i>i</i> |
| Ala <sup>13</sup>   | <i>k</i> | <i>a</i> | <i>d</i> | —                                                      | —                               |                                                                              |
| Val <sup>14</sup>   | 175.24   | 64.78    | <i>b</i> | <i>h</i> ; <i>i</i>                                    |                                 |                                                                              |
| Ala <sup>15</sup>   | <i>k</i> | <i>a</i> | <i>d</i> | —                                                      | —                               |                                                                              |
| Val <sup>16</sup>   | 173.15   | 64.48    | <i>b</i> | <i>h</i> ; <i>i</i>                                    | —                               |                                                                              |
| DhThr <sup>17</sup> | 165.84   | <i>f</i> | 128.98   | 12.79                                                  | —                               |                                                                              |
| Thr <sup>18</sup>   | 171.95   | 59.98    | 71.68    | 18.85                                                  | —                               |                                                                              |
| Ala <sup>19</sup>   | <i>j</i> | 51.78    | <i>d</i> | —                                                      | —                               |                                                                              |
| Dab <sup>20e</sup>  | 173.15   | <i>a</i> | <i>b</i> | 37.16                                                  | —                               | <u>CO</u> CH <sub>3</sub> : 170.53;<br>CO <u>CH</u> <sub>3</sub> : 23.00     |
| Ser <sup>21</sup>   | 169.49   | <i>a</i> | 64.48    | —                                                      | —                               | <u>CO</u> CH <sub>3</sub> : 171.17;<br>CO <u>CH</u> <sub>3</sub> : <i>i</i>  |
| Val <sup>22</sup>   | 170.41   | 57.08    | 30.27    | $\gamma$ <u>CH</u> <sub>3</sub> : <i>h</i> ;<br>18.07; | —                               |                                                                              |

\* The <sup>13</sup>C NMR chemical shifts of the fatty acid moiety were as follows. C-1,  $\delta_C$  171.54; C-2,  $\delta_C$  40.97; C-3,  $\delta_C$  71.68; C-4, *e*; C-5,  $\delta_C$  34.94; C-6, *b*; C-7, not assignable; C-8 or C-9,  $\delta_C$  23.20 or 32.48; C-10,  $\delta_C$  12.79. CH<sub>3</sub>CO:  $\delta_C$  170.79; CH<sub>3</sub>CO:  $\delta_C$  20.90.

\*\* a—k: the  $\delta_C$  of these signals were very close each other, thus the correct assignments were unsuccessful.

*a*:  $\delta_C$  53.23, 53.29, 53.46, 53.79, 53.86.

*b*: overlapped with solvent peak

*c*:  $\delta_C$  63.85, 63.95

*d*:  $\delta_C$  16.14, 16.30, 16.38, 16.52, 16.60, 16.67, 16.77, 17.02

*e*:  $\delta_C$  25.89, 26.03

*f*:  $\delta_C$  132.44, 132.52, 132.74

*g*:  $\delta_C$  12.20, 12.31

*h*:  $\delta_C$  19.62, 19.67, 19.73, 19.86, 20.15

*i*:  $\delta_C$  20.82, 20.90, 21.13, 21.17, 21.20

*j*:  $\delta_C$  175.82, 175.76, 175.82

*k*:  $\delta_C$  177.14, 177.29, 177.54

**cichorinotoxin** Ref. This paper

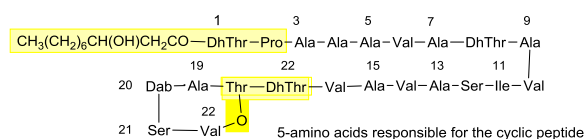

**cichoheptin A and B** Ref. Huang, C-J. et al, Mol Plant Microbe Interact., 2015, **28**, 1009-1022

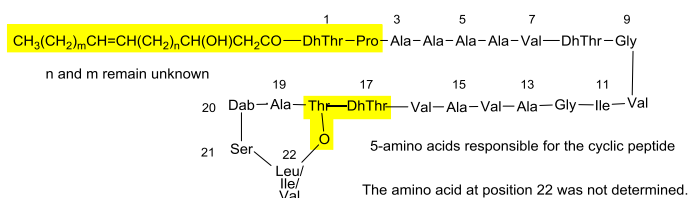

**Syringopeptin-22A and -22B** Ref. Ballio A. et al., FEBS Lett., 1991, **291**, 109-112

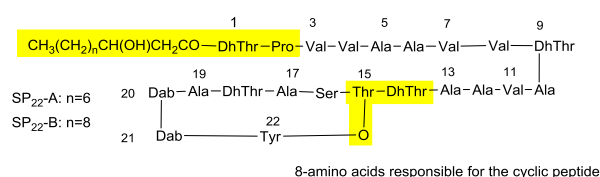

**Corpeptin** Ref., Emanuele, M. C. et al, FEBS Lett., 1998, **433**, 317-320

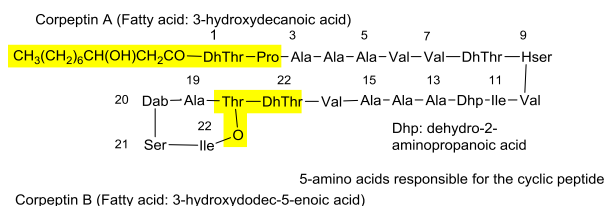

Corpeptin B (Fatty acid: 3-hydroxydodec-5-enoic acid)

$\text{CH}_3(\text{CH}_2)_5\text{CH}=\text{CHCH}_2\text{CH}(\text{OH})\text{CH}_2\text{CO}-$   
amino acid backbone is completely identical to that of corpeptin A

**Fuscopeptin** Ref. Ballio A. et al. FEBS lett., 1996, **381**, 213-216

Fuscopeptin A (fatty acid: 3-hydroxyoctanoate (n=4))

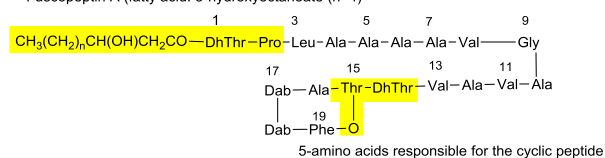

Fuscopeptin B (fatty acid: 3-hydroxydecanoic acid (n=6))

**Tolaasin I** Ref. Nutkins, J. C. et al., J. Am. Chem. Soc., 1991, **113**, 2621-2627

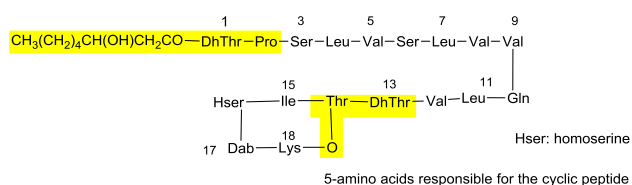

**Figure S15:** Typical lipodepsipeptides having biological activities. The lipophilic residues (fatty acids) connected with DhThr-Pro are conserved. The two amino acids—DhThr-Thr—are strictly conserved and the OH of the Thr residue is connected to other amino acids through ester bond. The conserved portions are highlighted with yellow background.

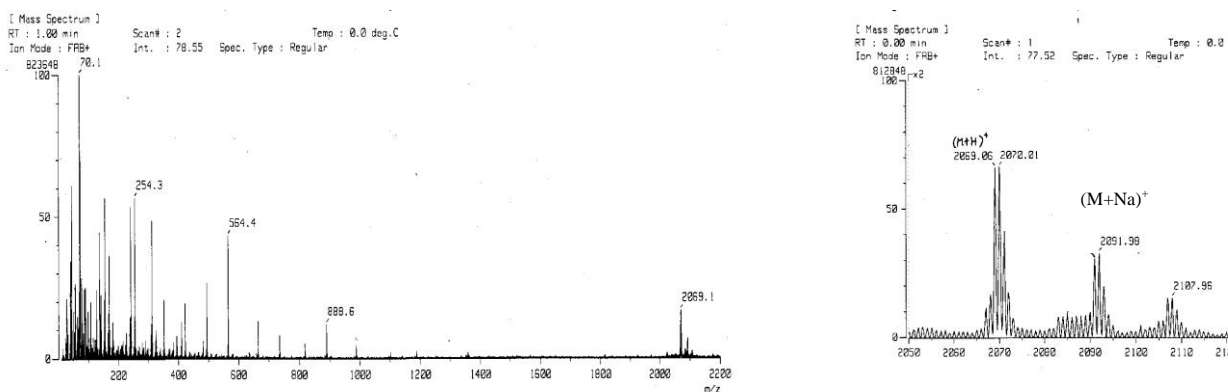

**Figure S16A:** FABMS spectrum of compound **A** (matrix: NBA); This FABMS data indicated the MW of compound **A** is the same as that of original cichorinotoxin. Remark:  $[M + H]^+$  and  $[M + Na]^+$  were observed, in a similar was as Figures S4A.

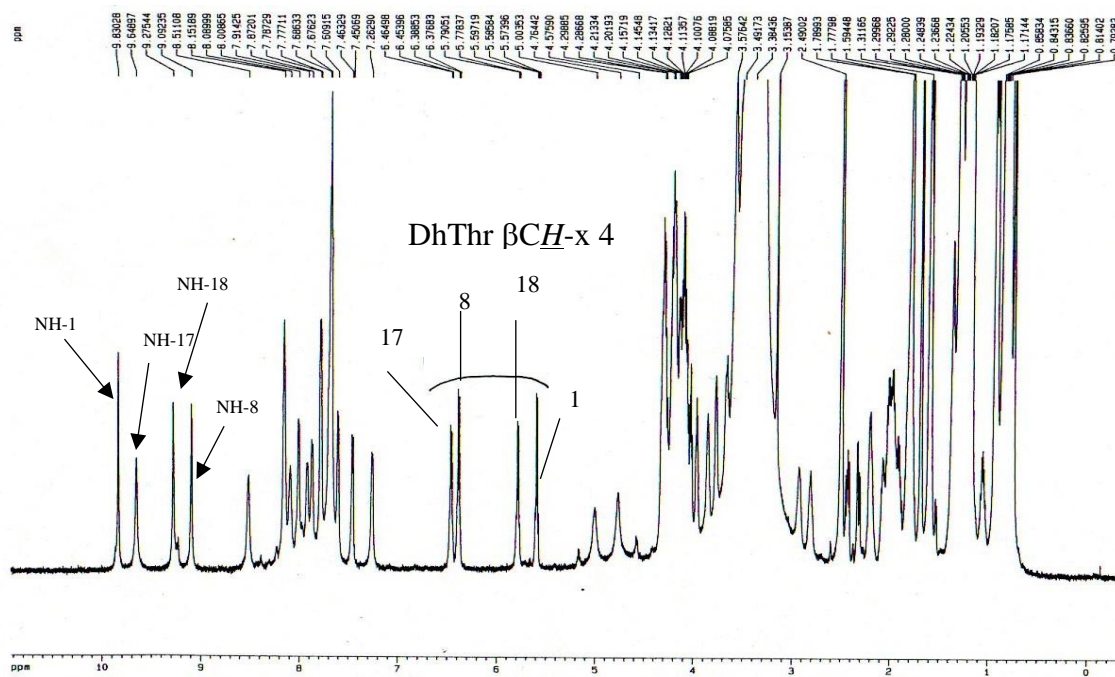

**Figure S16B:**  $^1\text{H}$ -NMR of compound **A** (600 MHz,  $\text{DMSO-}d_6$ ). Remark: 4  $\beta\text{CH}$  protons of DhThr were observed, despite 3  $\beta\text{CH}$  protons of DhThr are present in the original chicorinotoxin (compare Figure S6 with Figure S16B). The numbers of the amide protons ( $\text{NH}$ ) and the olefinic protons ( $\beta\text{CH}$  proton) indicate the positions of amino acids in the cichorinotoxin.

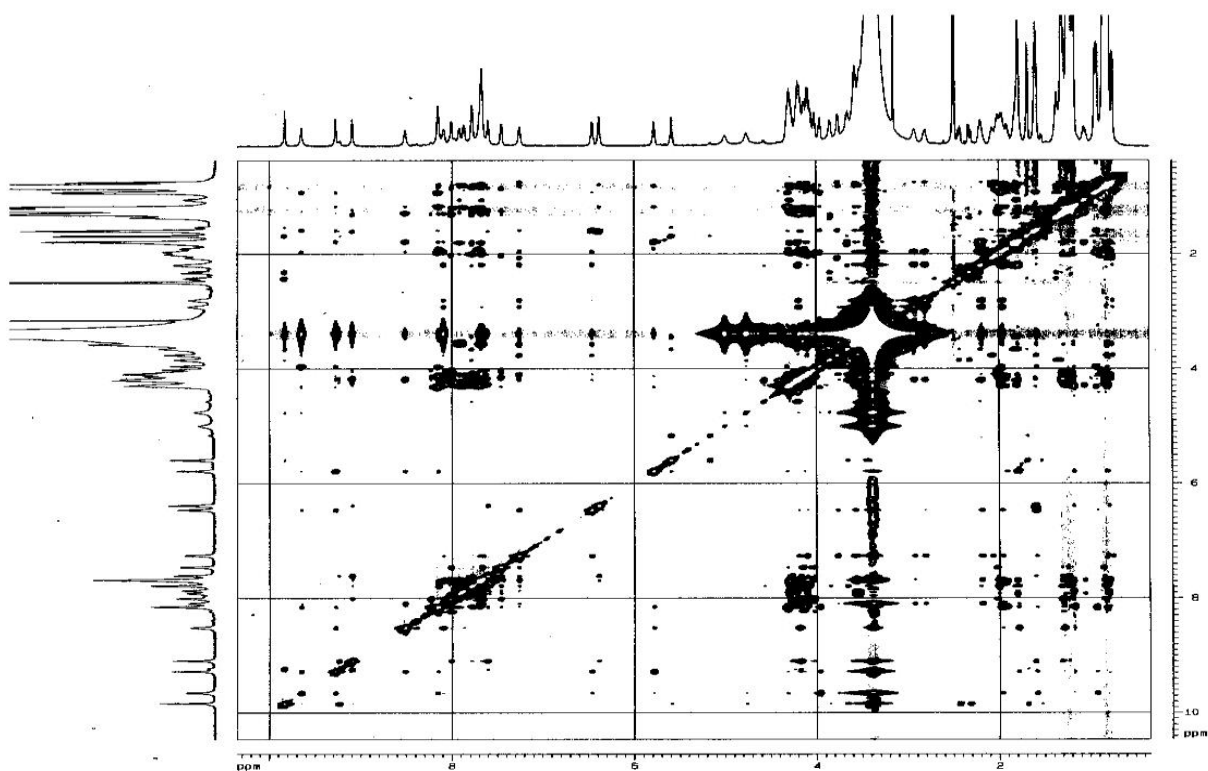

**Figure S16C:** Overall NOESY spectrum of compound A (600 MHz, DMSO-*d*<sub>6</sub>).

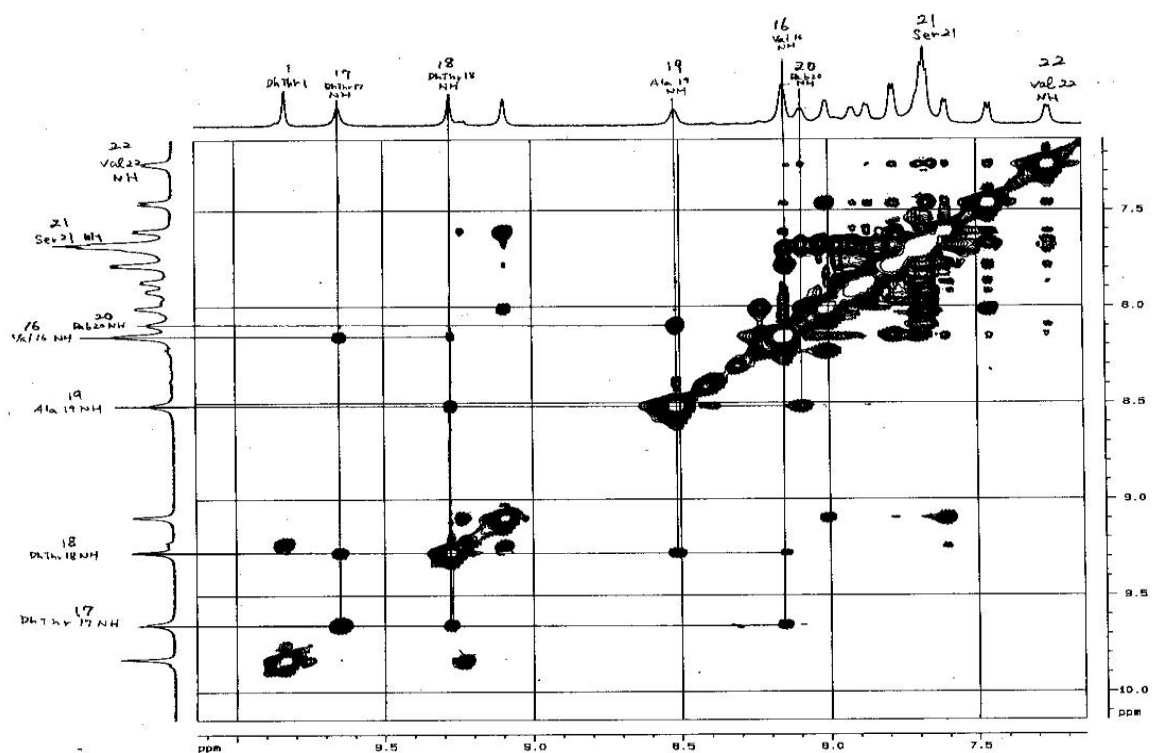

**Figure S16D:** NOESY correlations for  $\alpha\text{N}^i\text{H}/\alpha\text{N}^{i+1}\text{H}$  (expanded region of Figure S16B).



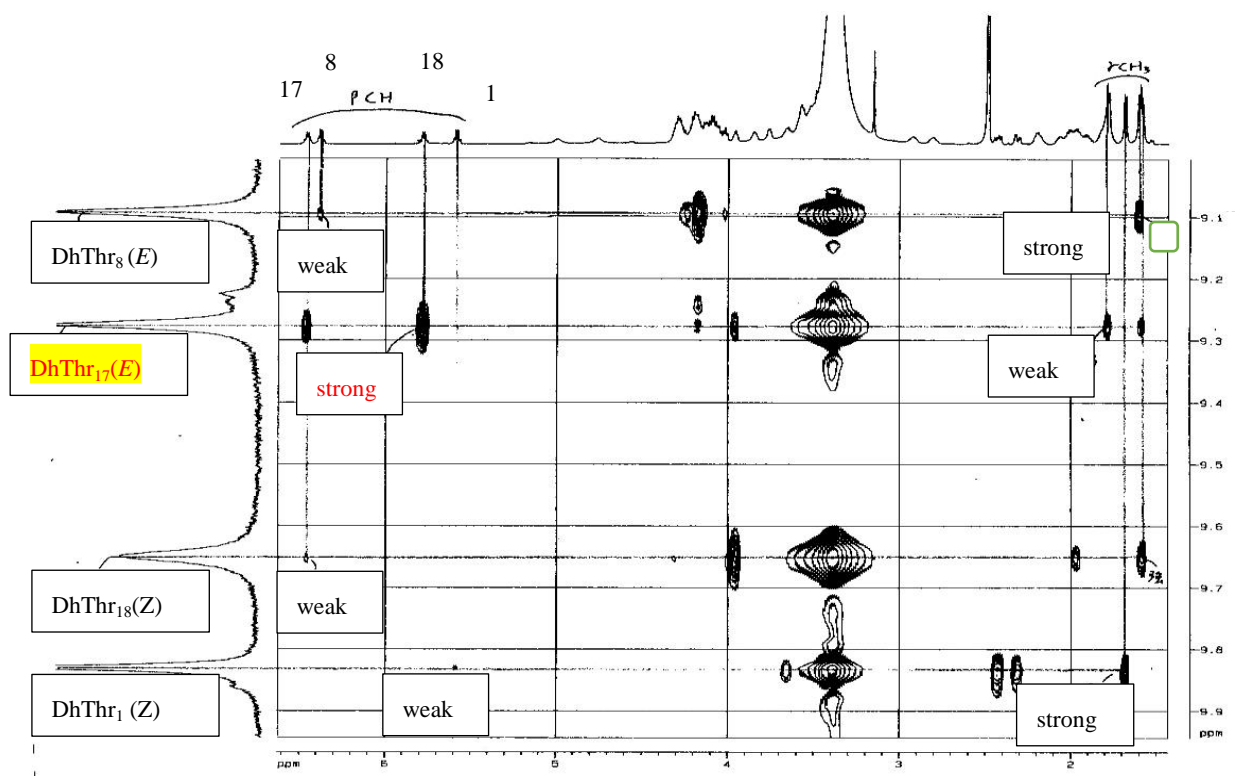

**Figure S16E:** NOESY correlations for determining the *E,Z*-geometry of DhThr of compound A.

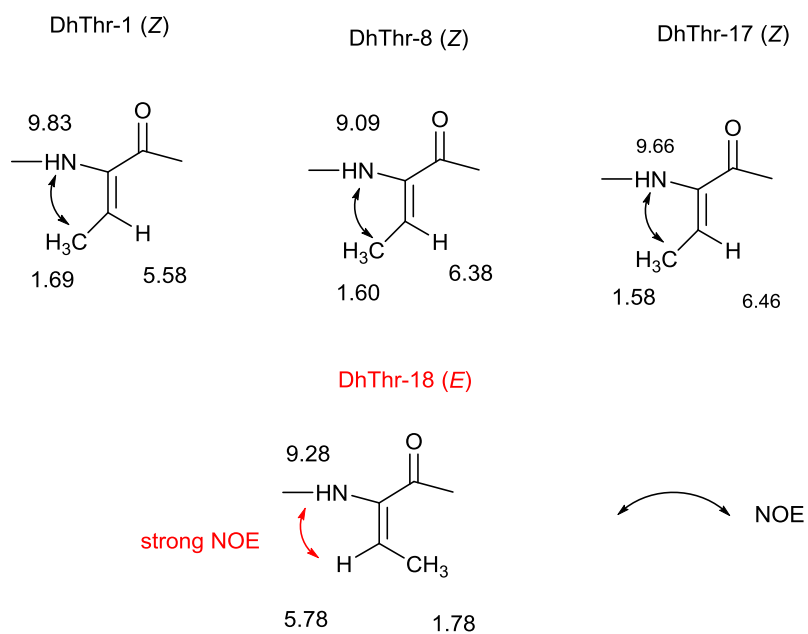

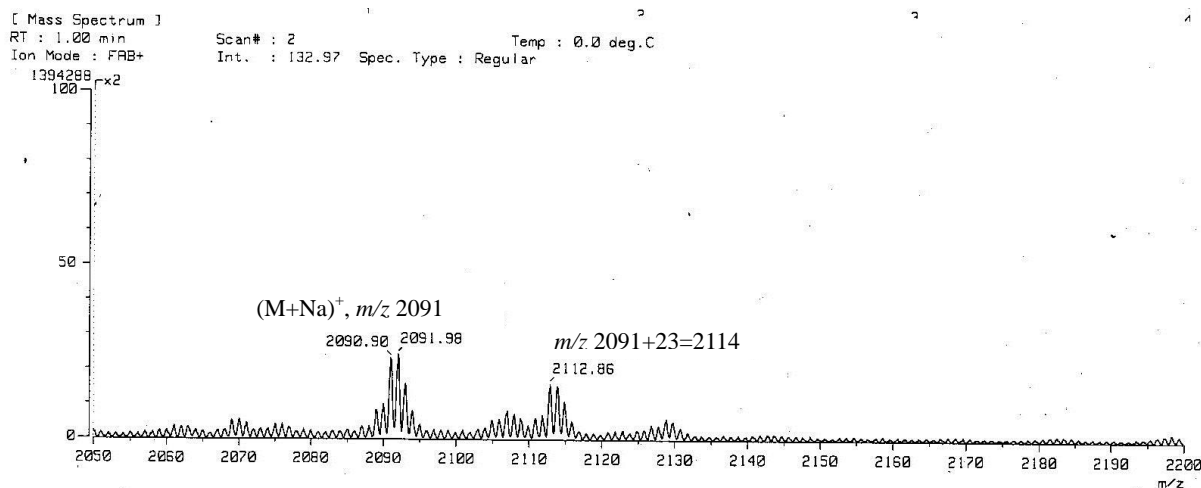

**Figure S17A:** FABMS spectrum of compound **B** (matrix: NBA). The ions,  $m/z$  2091 and  $m/z$  2114, were observed, but no peak  $[M + H]^+$  ( $m/z$  2069) was detected, despite the  $[M + H]^+$  ion having been observed for compound **A**. This phenomenon was also observed in the FABMS spectrum of Figure S4B. The careful NMR analyses of compound **B** including 2D NMR indicated that the MW should be the same as that of cichorinotoxin (MW: 2068).

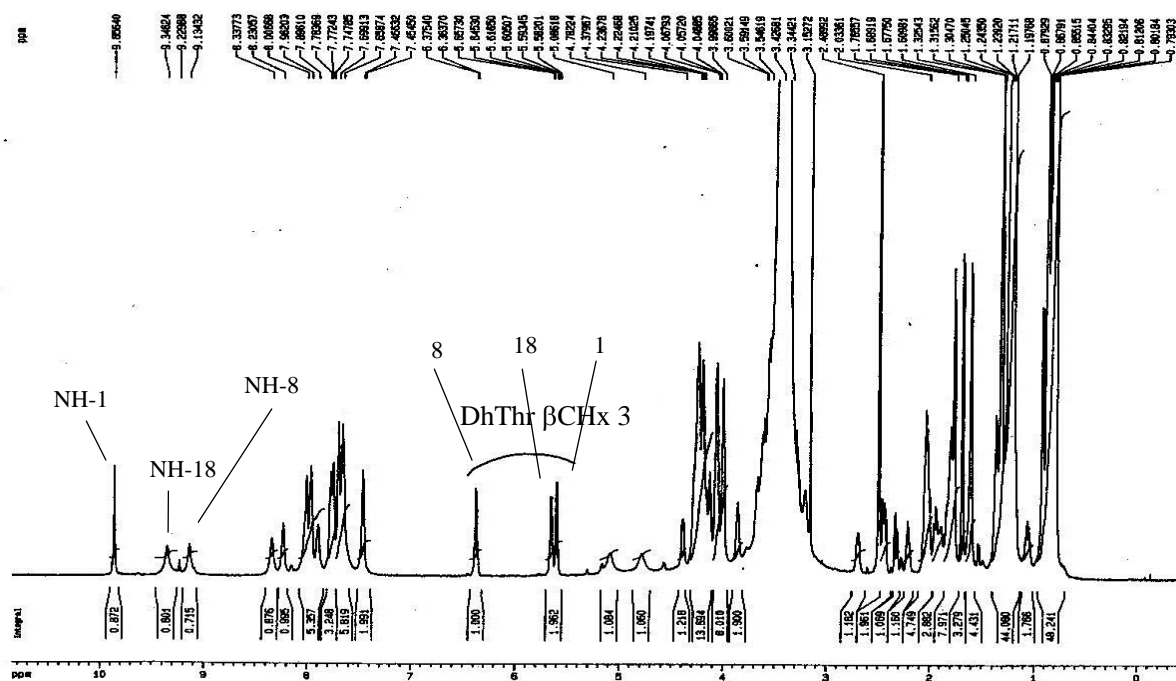

**Figure S17B:**  $^1\text{H}$  NMR spectrum of compound **B** (600 MHz,  $\text{DMSO}-d_6$ ). The amide protons (NH) and the olefinic protons ( $\beta\text{CH}$  proton) are shown by the numerical figures. Remark: The numbers of the DhThr residues (3 residues) of compound **B** are the same as natural cichorinotoxin (3 residues).

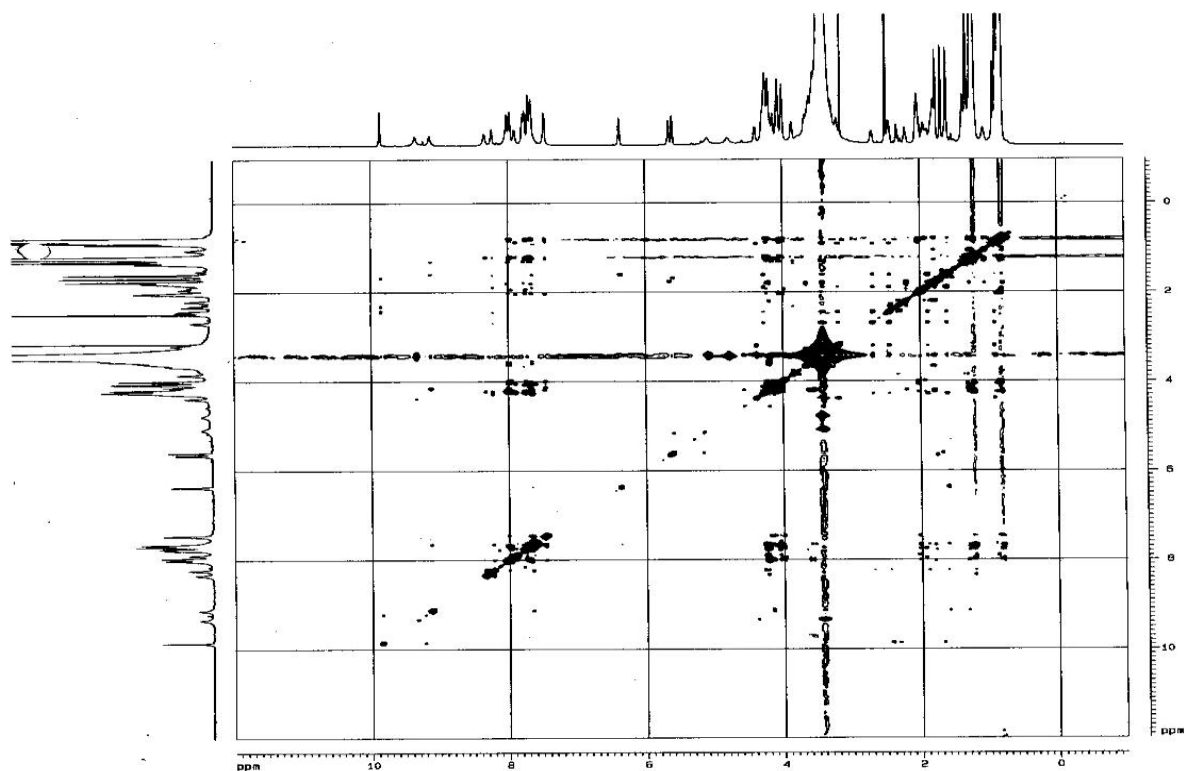

**Figure S17C:** The overall NOESY spectrum compound **B** (600 MHz, DMSO- $d_6$ ).

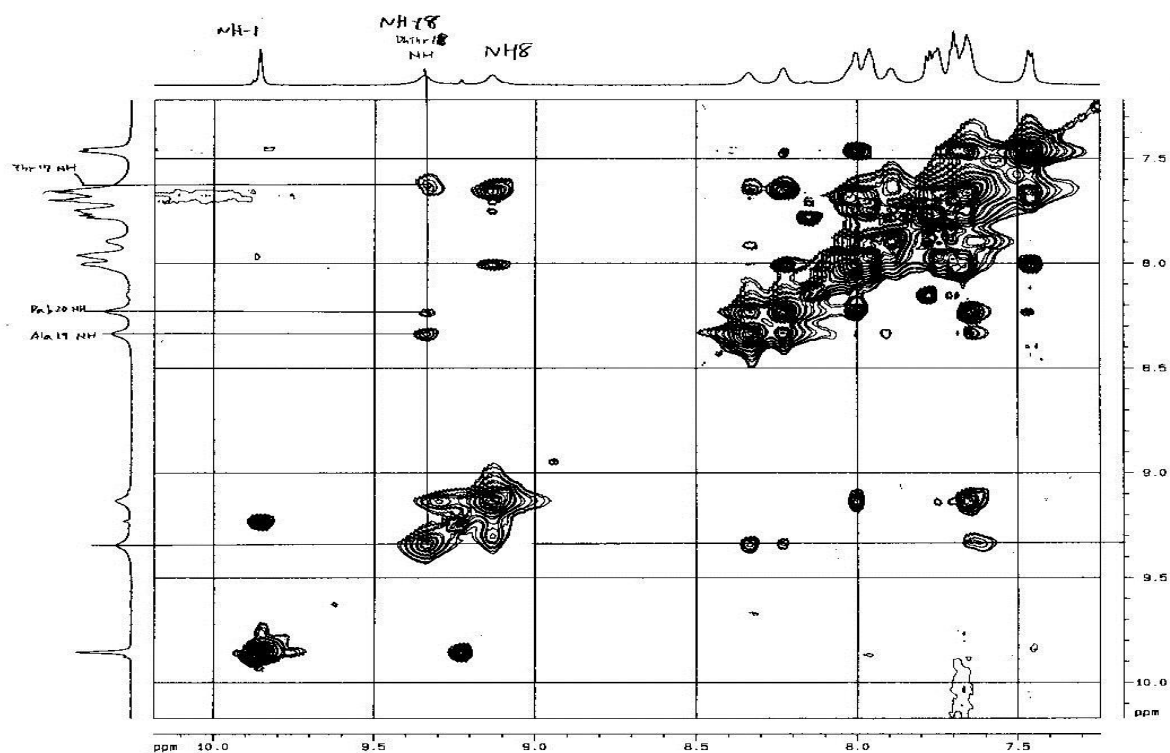

**Figure S17D:** NOESY correlations for  $\alpha\text{NH}/\alpha\text{NH}$  (expanded region of Figure S17C).

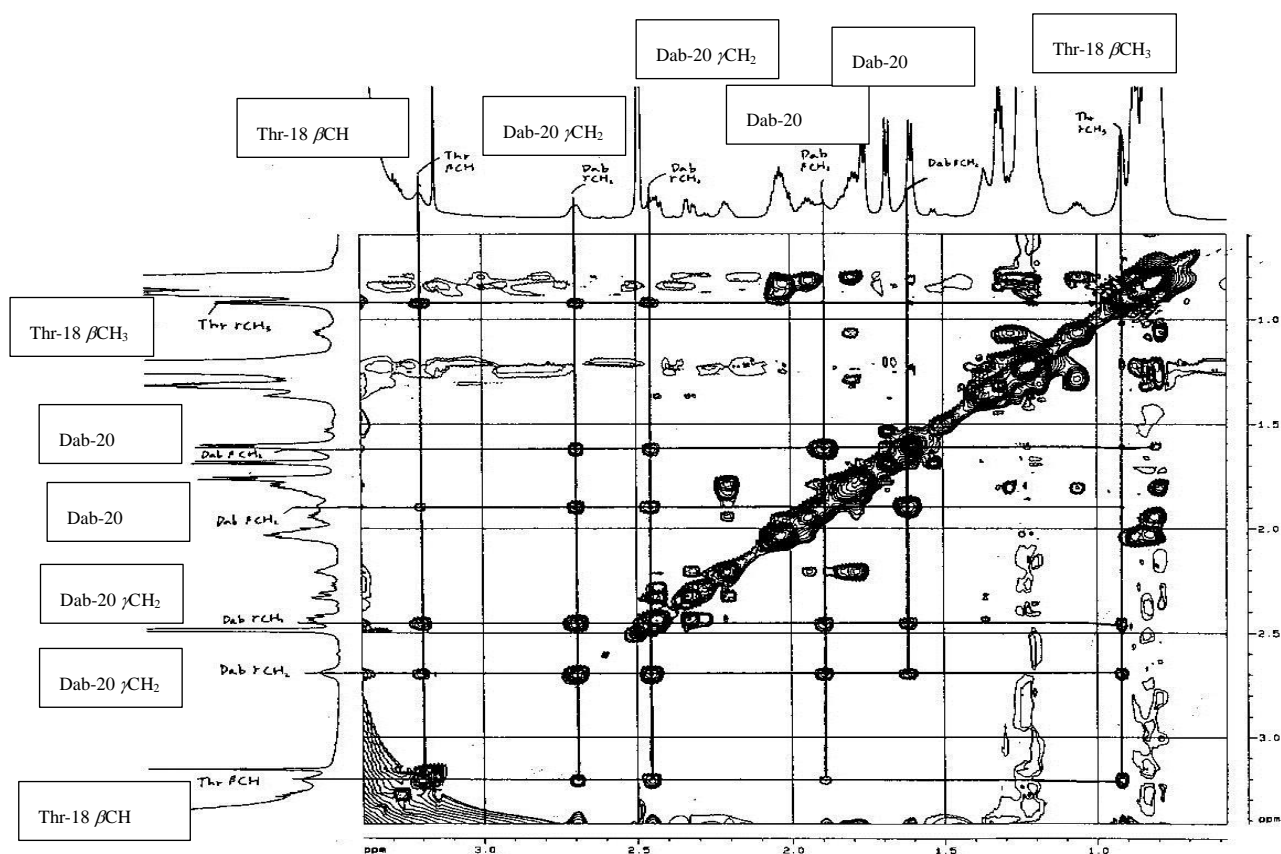

**Figure S17E:** NOESY correlations highlighted between  $\beta\text{CH}_2$  of Thr<sub>17</sub> and  $\gamma\text{CH}_2$  of Dab<sub>20</sub>.

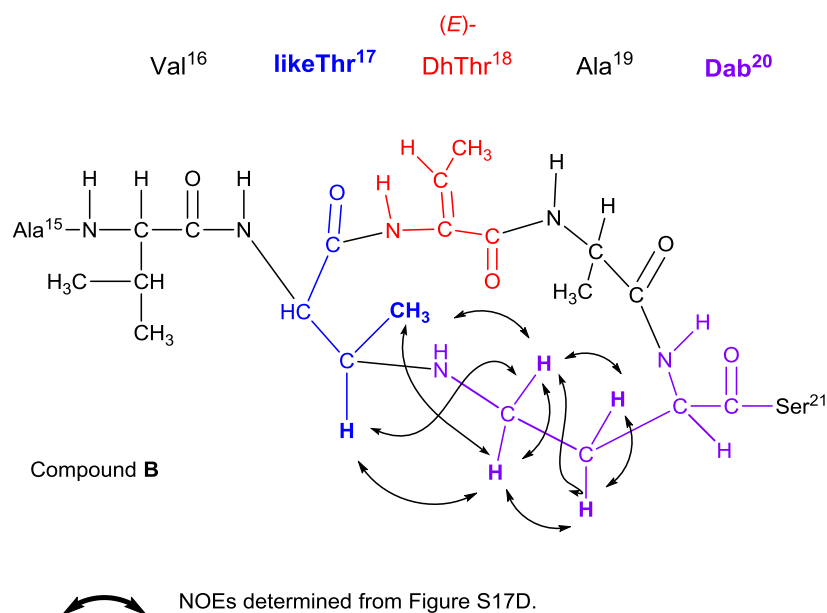

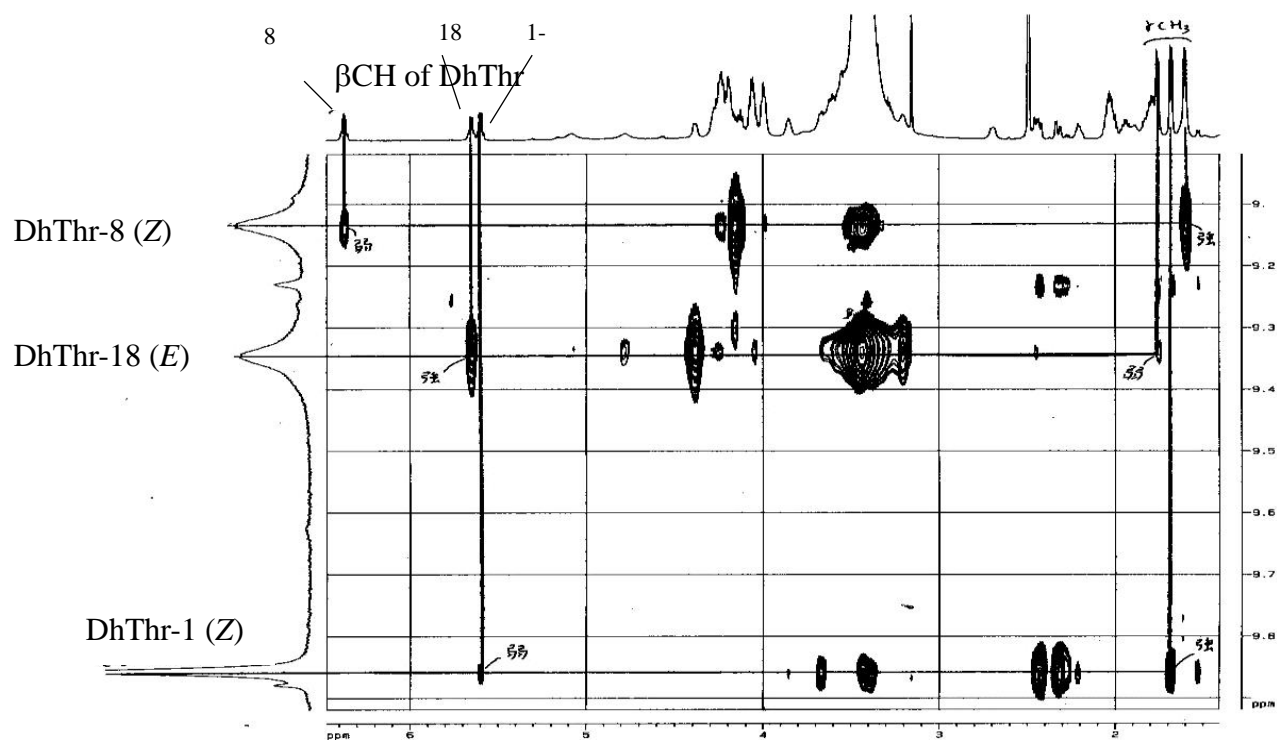

**Figure S17F:** NOESY spectrum for the determination of *E,Z*-configuration of three DhThr residues.

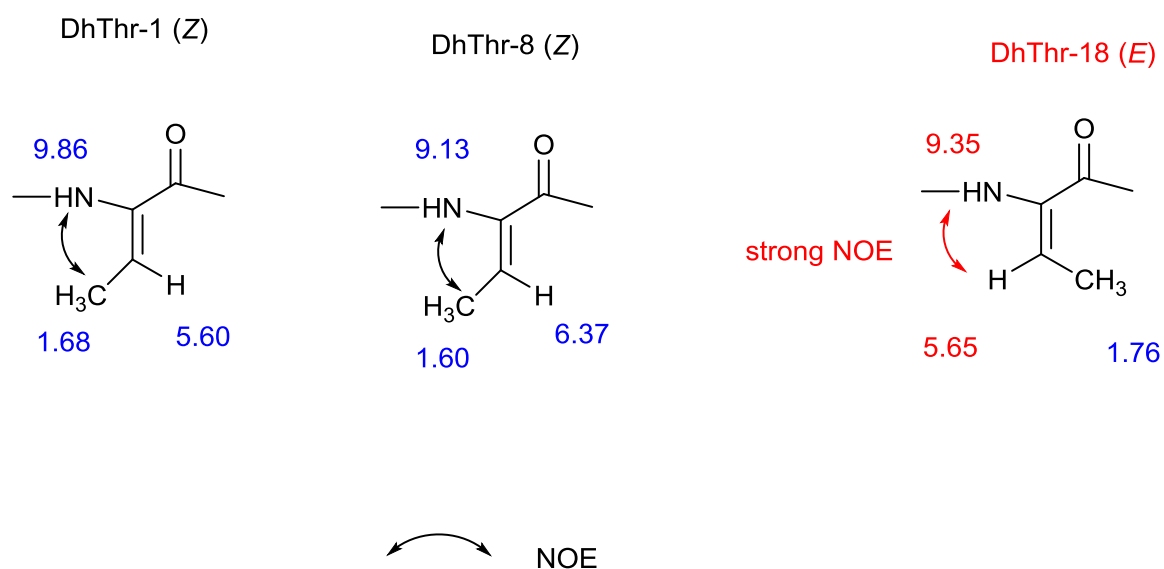

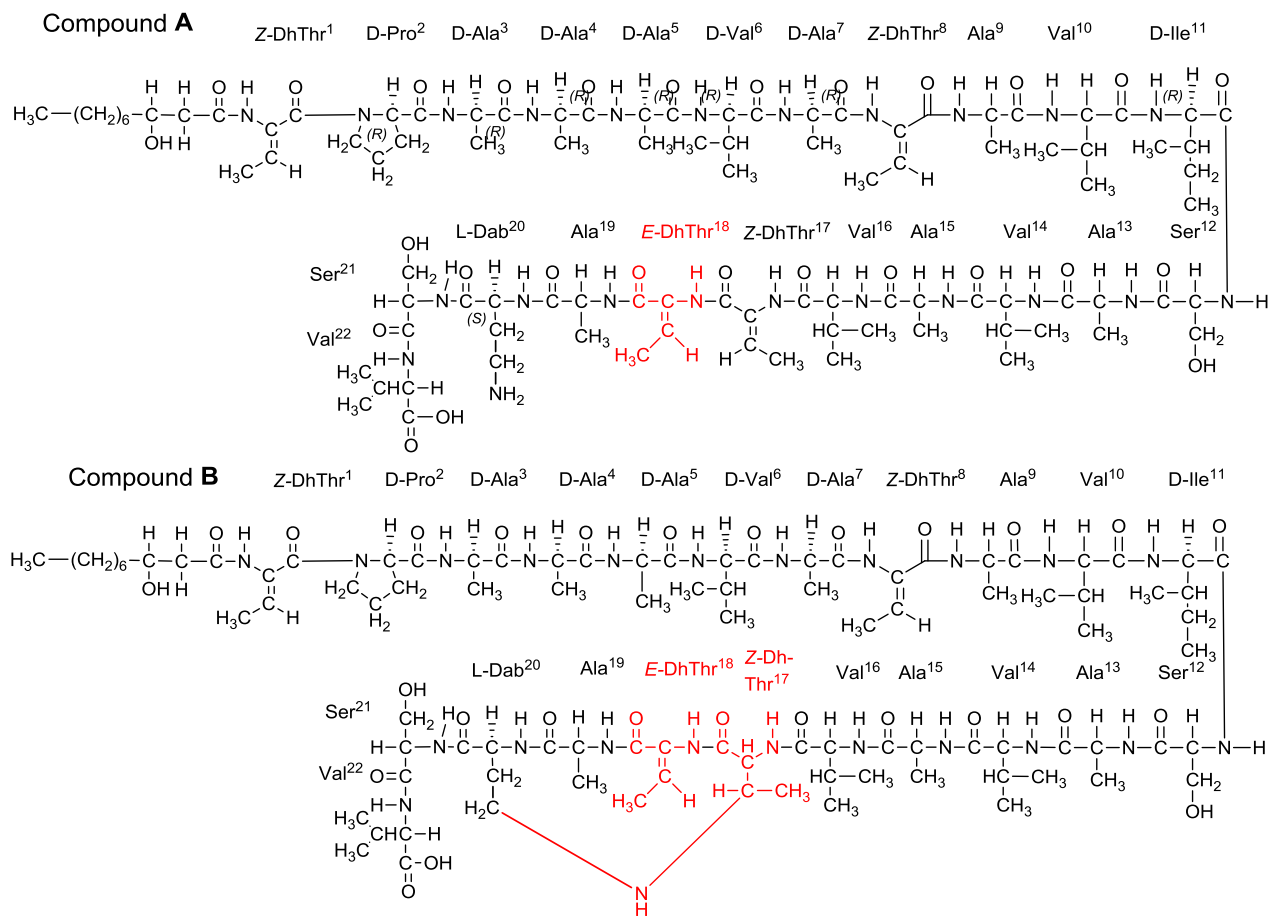

**Figure S18:** Overall structures of compounds **A** and **B**, which were generated by the alkaline hydrolysis of natural cichorinotoxin.

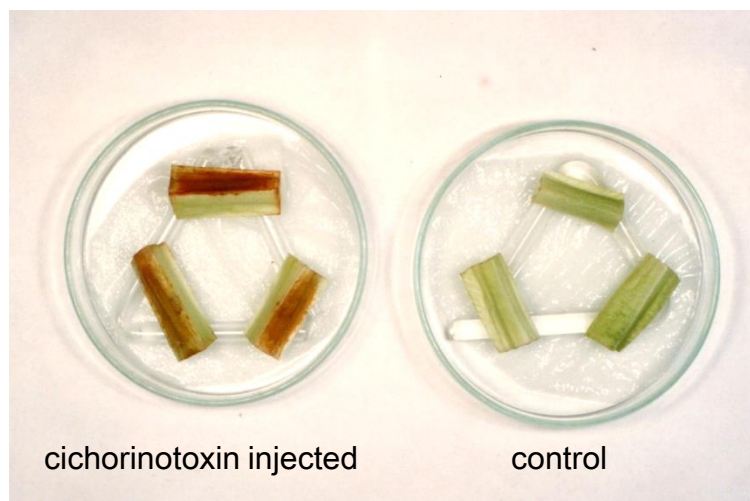

**Figure S19A:** This photograph shows the bioassay method. Left: cichorinotoxin was injected to the lettuce midrib (just under the epidermis) and stood at ambient temperature for 1 day. A small amount of water was immersed in a filter paper, which was placed below the petri dish. This necrotic lesion appears after standing usually for 1 to 2 days.

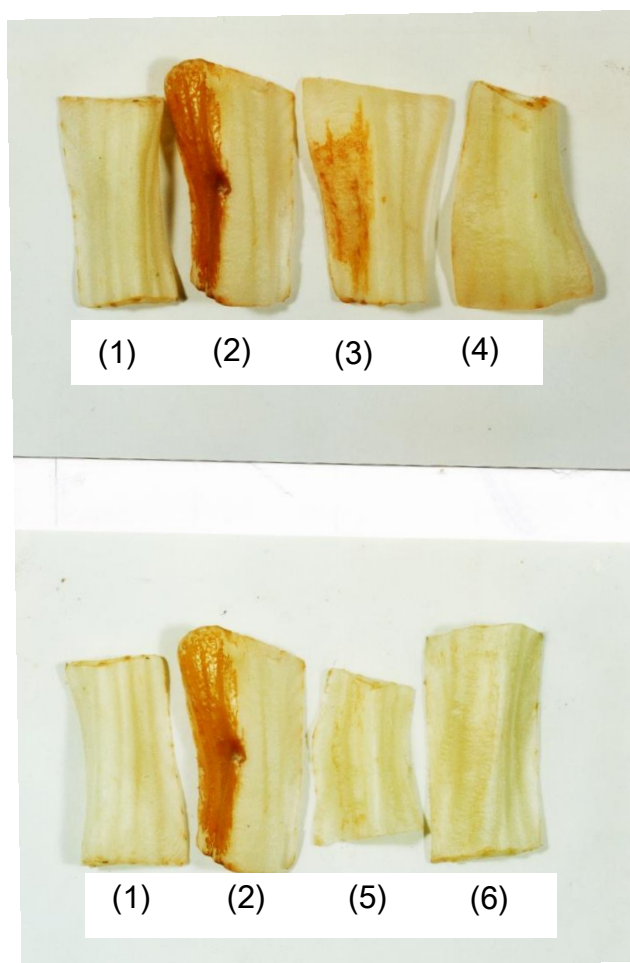

**Figure S19B:** Necrotic lesions of lettuce, which were caused by the following compounds. (1) Distilled water; (2) cichorinotoxin; (3) mono-acetate; (4) tetra-acetate; (5) compound A; (6) compound B.

One mg of these compounds (2)–(5) were dissolved in MeOH (100  $\mu$ l). To the 10  $\mu$ l of the MeOH solution, 190  $\mu$ l of a distilled water was added. The suspensions thus obtained were well immingled and 50  $\mu$ l of this suspension was injected into each midrib of lettuce. The injected quantities were 25  $\mu$ g for each of compounds (2)–(5). (1) indicates the control, the experiment of which was carried out by no injection of any other compounds (just the distilled H<sub>2</sub>O including small amount of MeOH was injected). Necrotic activities caused by compounds (3)–(6) were significantly decreased, therefore these pictures were taken after standing 3 days at 30 °C.



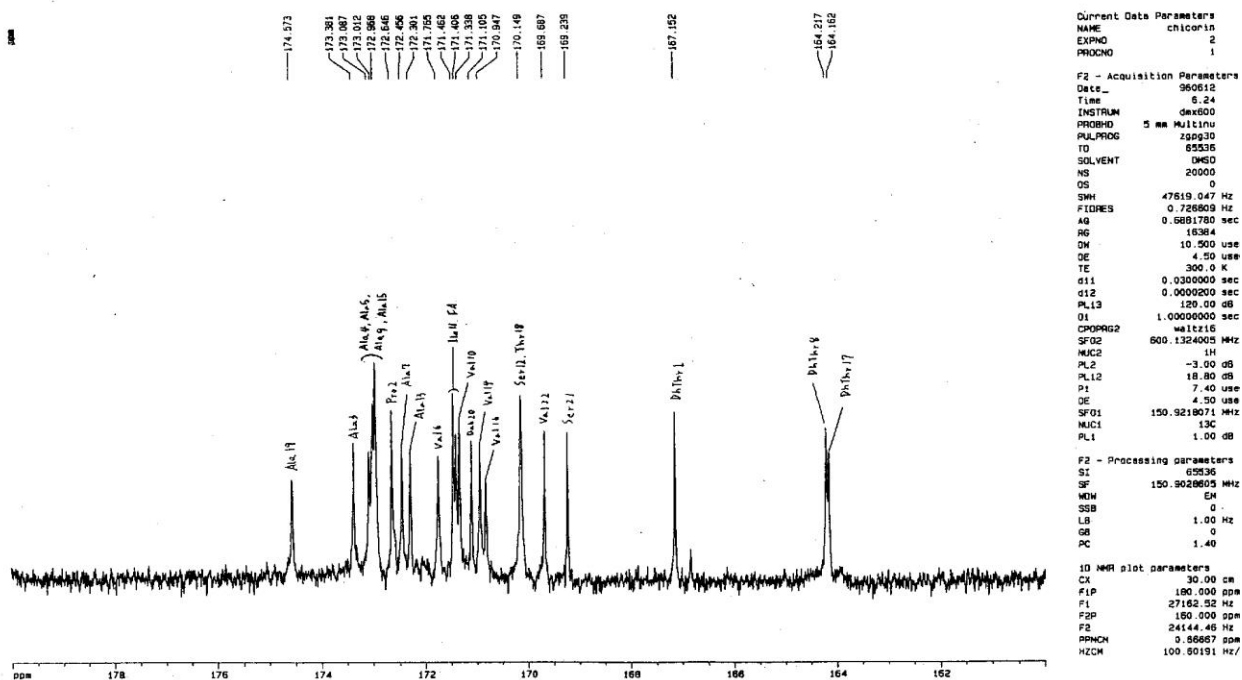

**Figure S20A:**  $^{13}\text{C}$  NMR spectrum of natural cichorinotoxin (150 MHz,  $\text{DMSO}-d_6$ ).

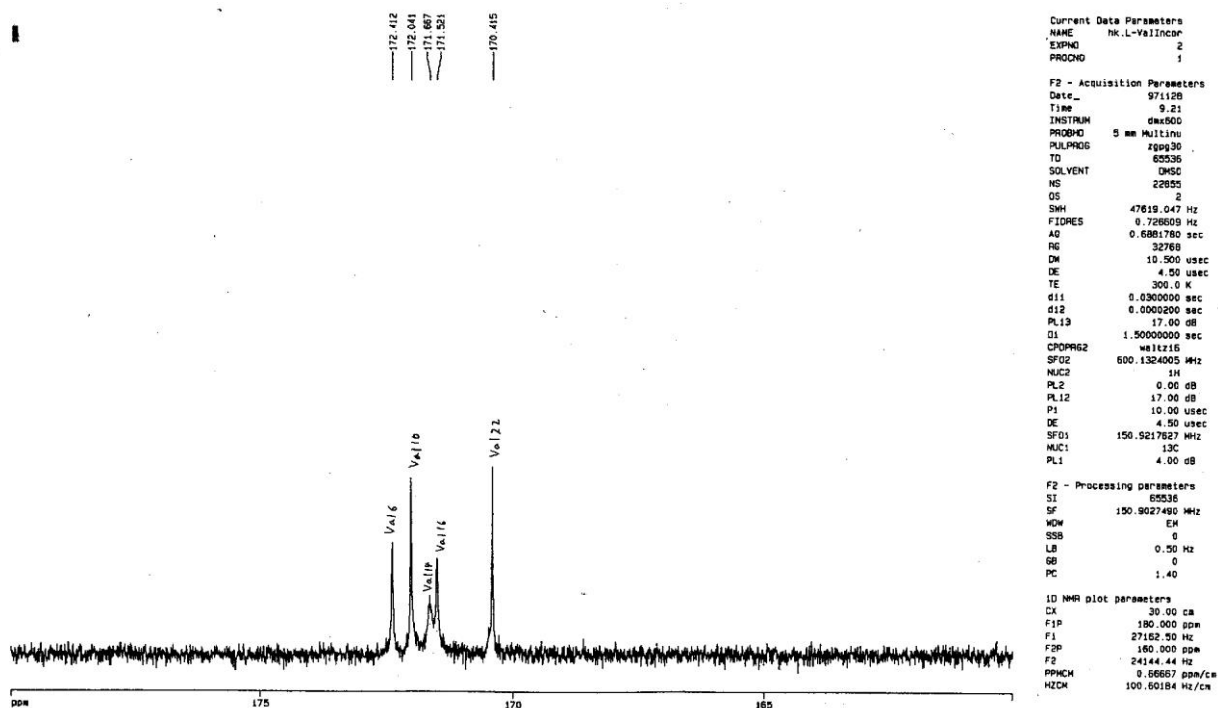

**Figure S20B:**  $^{13}\text{C}$  NMR spectrum of cichorinotoxin (150 MHz,  $\text{DMSO}-d_6$ ), which was obtained by feeding L-[1- $^{13}\text{C}$ ]-labelled Val.

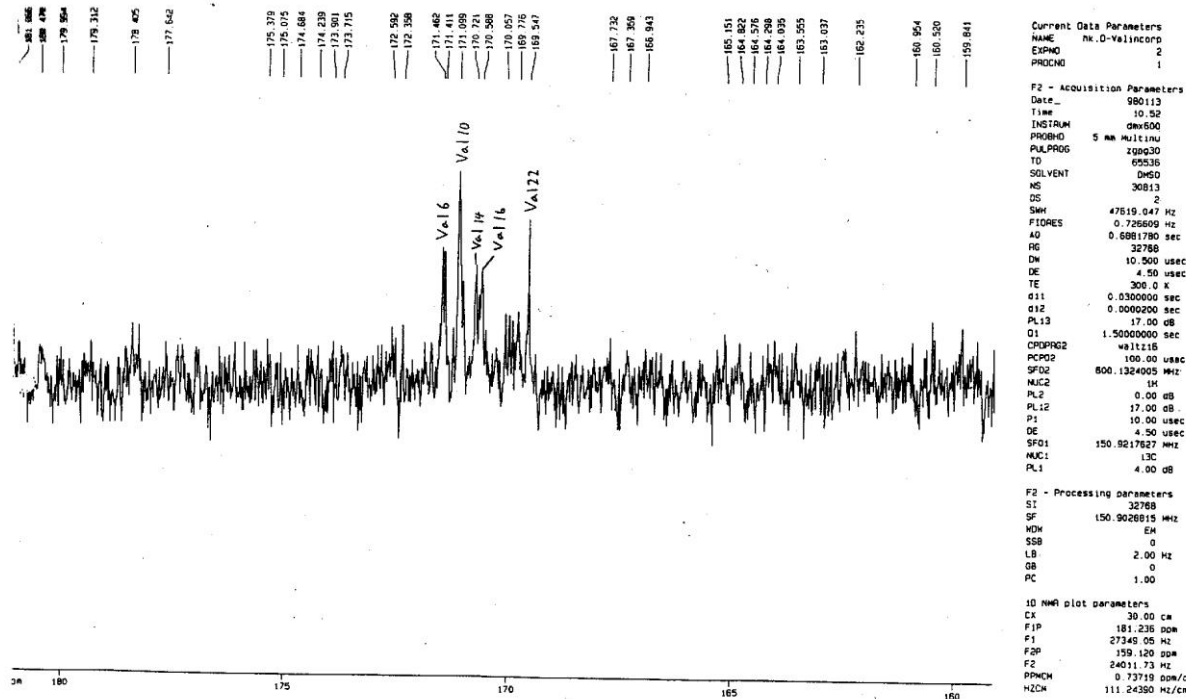

**Figure S20C:**  $^{13}\text{C}$  NMR spectrum of cichorinotoxin (150 MHz,  $\text{DMSO-}d_6$ ), which was obtained by feeding D-[1- $^{13}\text{C}$ ]-labelled Val.

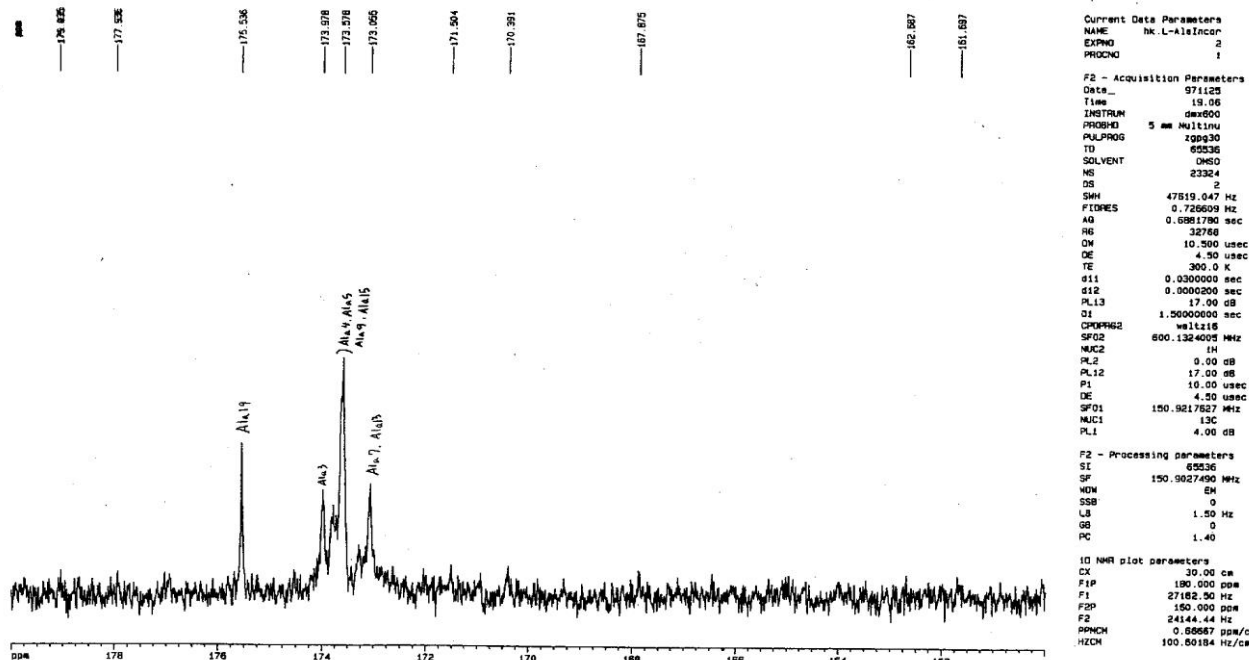

**Figure S20D:**  $^{13}\text{C}$  NMR spectrum of cichorinotoxin (150 MHz,  $\text{DMSO-}d_6$ ), which was obtained by feeding L-[1- $^{13}\text{C}$ ]-labelled Ala.

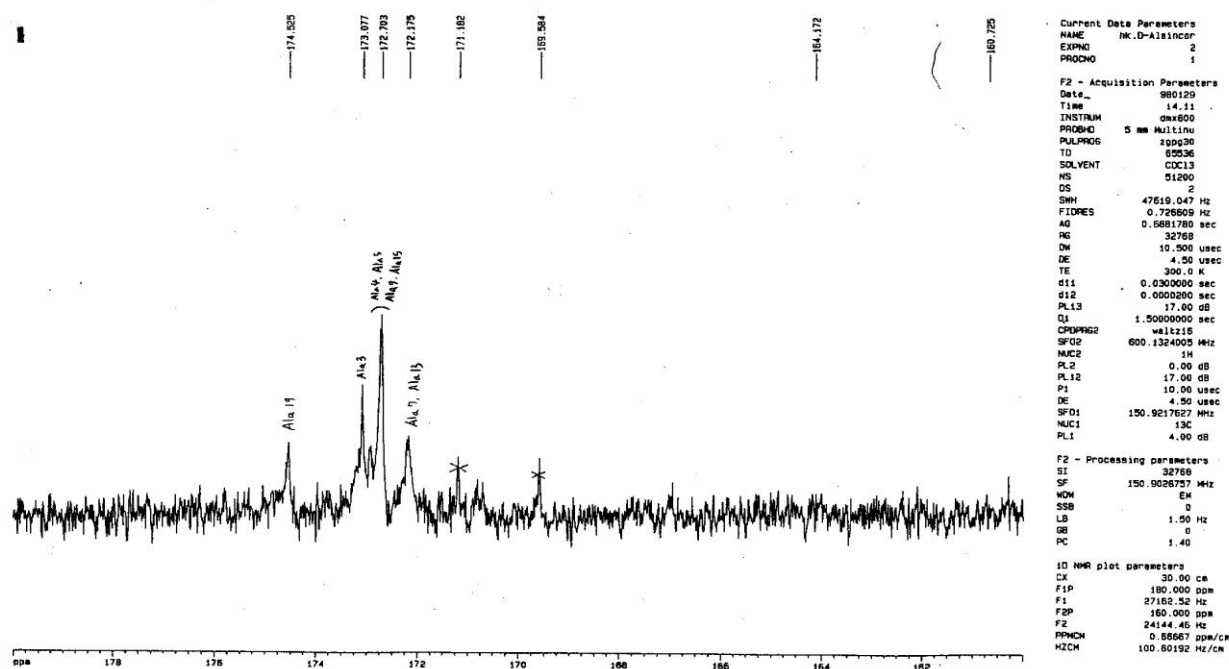

**Figure S20E:**  $^{13}\text{C}$  NMR spectrum of cichorinotoxin (150 MHz,  $\text{DMSO-}d_6$ ), which was obtained by feeding D-[1- $^{13}\text{C}$ ]-labelled Ala.

**Conclusions:** Five Val residues ( $\text{Val}^6$ ,  $\text{Val}^{10}$ ,  $\text{Val}^{14}$ ,  $\text{Val}^{16}$  and  $\text{Val}^{22}$ ) are involved in cichorinotoxin (Figure 6, main Text). The five Val residues are well separated in the  $^{13}\text{C}$  NMR spectra (Figures S20A, S20B and S20C). All the five Val residues were labelled by the feedings of L- and D- $^{13}\text{C}$  labelled Val amino acids, despite both D- and L- Val residues being involved in cichorinotoxin (see Table 1, main Text). This finding definitively demonstrated that a racemase is included in the NRPS biosynthetic gene cluster.

Figures S20D and 20E indicated that any other amino acids other than Ala were not labelled and that the two spectra showed almost the same pattern. Separate administrations of D- and L-Ala enriched all the signals of amide carbonyl groups of Ala residues ( $\text{Ala}^{19}$ ,  $\text{Ala}^3$ ,  $\text{Ala}^4$ ,  $\text{Ala}^5$ ,  $\text{Ala}^9$ ,  $\text{Ala}^{15}$ ,  $\text{Ala}^7$  and  $\text{Ala}^{13}$ ), despite both D- and L- Ala residues being involved in cichorinotoxin (Table 1, main Text), suggesting that the epimerase (racemase) are present in the biosynthetic gene cluster.
